# Supplementary material for: Pragmatic cluster randomised control trial using Vaxcards as an age-appropriate tool to incentivise and educate school students about vaccination
Source: PubMed Central journal article supplement — BMJ Open. 2021 Sep 2;11(9):e049562. doi: 10.1136/bmjopen-2021-049562 (PMC8413930; doi:10.1136/bmjopen-2021-049562), 2021-09-02
Supplement: bmjopen-2021-049562.draft_revisions.pdf [file bmjopen-2021-049562.draft_revisions.pdf]

# BMJ Open

BMJ Open is committed to open peer review. As part of this commitment we make the peer review history of every article we publish publicly available.

When an article is published we post the peer reviewers' comments and the authors' responses online. We also post the versions of the paper that were used during peer review. These are the versions that the peer review comments apply to.

The versions of the paper that follow are the versions that were submitted during the peer review process. They are not the versions of record or the final published versions. They should not be cited or distributed as the published version of this manuscript.

BMJ Open is an open access journal and the full, final, typeset and author-corrected version of record of the manuscript is available on our site with no access controls, subscription charges or pay-per-view fees (<http://bmjopen.bmj.com>).

If you have any questions on BMJ Open's open peer review process please email [info.bmjopen@bmj.com](mailto:info.bmjopen@bmj.com)

# BMJ Open

## Pragmatic Cluster Randomised Control Trial using Vaxcards as an age-appropriate tool to incentivise and educate school students about vaccination: a pilot trial.

|                               |                                                                                                                                                                                                                                                                                                         |
|-------------------------------|---------------------------------------------------------------------------------------------------------------------------------------------------------------------------------------------------------------------------------------------------------------------------------------------------------|
| Journal:                      | <i>BMJ Open</i>                                                                                                                                                                                                                                                                                         |
| Manuscript ID                 | bmjopen-2021-049562                                                                                                                                                                                                                                                                                     |
| Article Type:                 | Original research                                                                                                                                                                                                                                                                                       |
| Date Submitted by the Author: | 31-Jan-2021                                                                                                                                                                                                                                                                                             |
| Complete List of Authors:     | Epstein, Daniel; Monash University, Department of General Practice<br>Enticott, Joanne; Monash University Department of General Practice; Southern Synergy,<br>Larson, Heidi; London School of Hygiene and Tropical Medicine, Infectious Disease Eoidemiology<br>Barton, Christopher; Monash University |
| Keywords:                     | Paediatric infectious disease & immunisation < PAEDIATRICS, Public health < INFECTIOUS DISEASES, PUBLIC HEALTH                                                                                                                                                                                          |
|                               |                                                                                                                                                                                                                                                                                                         |

SCHOLARONE™  
Manuscripts

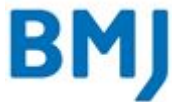

I, the Submitting Author has the right to grant and does grant on behalf of all authors of the Work (as defined in the below author licence), an exclusive licence and/or a non-exclusive licence for contributions from authors who are: i) UK Crown employees; ii) where BMJ has agreed a CC-BY licence shall apply, and/or iii) in accordance with the terms applicable for US Federal Government officers or employees acting as part of their official duties; on a worldwide, perpetual, irrevocable, royalty-free basis to BMJ Publishing Group Ltd ("BMJ") its licensees and where the relevant Journal is co-owned by BMJ to the co-owners of the Journal, to publish the Work in this journal and any other BMJ products and to exploit all rights, as set out in our [licence](#).

The Submitting Author accepts and understands that any supply made under these terms is made by BMJ to the Submitting Author unless you are acting as an employee on behalf of your employer or a postgraduate student of an affiliated institution which is paying any applicable article publishing charge ("APC") for Open Access articles. Where the Submitting Author wishes to make the Work available on an Open Access basis (and intends to pay the relevant APC), the terms of reuse of such Open Access shall be governed by a Creative Commons licence – details of these licences and which [Creative Commons](#) licence will apply to this Work are set out in our licence referred to above.

Other than as permitted in any relevant BMJ Author's Self Archiving Policies, I confirm this Work has not been accepted for publication elsewhere, is not being considered for publication elsewhere and does not duplicate material already published. I confirm all authors consent to publication of this Work and authorise the granting of this licence.

**Title of the Study:** Pragmatic Cluster Randomised Control Trial using Vaxcards as an age-appropriate tool to incentivise and educate school students about vaccination: a pilot trial.

**Author names:** Epstein DS<sup>1</sup>, Enticott JC<sup>4,5</sup>, Larson HJ<sup>2,3</sup>, Barton CA<sup>1</sup>.

**Institutional affiliations:**

<sup>1</sup> Department of General Practice, Monash University

<sup>2</sup> The Vaccine Confidence Project, Department of Infectious Disease Epidemiology, London School of Hygiene and Tropical Medicine

<sup>3</sup> Dept. of Health Metrics & Evaluation, University of Washington

<sup>4</sup> Monash Partners, Advanced Health Research and Translation Centre, Melbourne, Australia

<sup>5</sup> Monash Centre for Health Research and Implementation, School of Public Health and Preventive Medicine, Monash University

**Key Words:** Vaccine hesitancy, vaccine confidence, vaccine consent, vaccination, vaccination rate, vaccine schedule, vaccine, vaccine education, preventative health, health education, health promotion, vaccine education

**Administrative Details:**

**Trial registration:** Australian New Zealand Clinical Trials Registry (ANZCTR).

**Registration number:**ACTRN12618001753246

**Date of trial registration:** 25/10/2018 8:24:21 AM

**Monash University Human Research Ethics Committee approval ID:**16814

**Manuscript word count** 2700

1  
2  
3 **Corresponding author contact details:** dan.epstein@monash.edu  
4

5 Postal: Department of General Practice, Monash University  
6

7 Building 1,  
8

9  
10 1/270 Ferntree Gully Road, Notting hill 3168  
11

12 Victoria, Australia.  
13

14 Ph: +610333024514  
15

16 Fax: +610333024300  
17  
18  
19  
20  
21

## 22 Abstract

23  
24  
25  
26 OBJECTIVES: This trial aimed to determine if return rates of consent forms  
27 for vaccination could be improved when Vaxcards was offered as an incentive to  
28 school children.  
29  
30  
31

32  
33  
34 SETTING: Nineteen schools in South East Melbourne participated.  
35  
36  
37

38 INTERVENTIONS: Students in the experimental arm received a pack of  
39 Vaxcards when they returned their government consent form.  
40  
41  
42  
43

44 OUTCOME MEASURES: Return of 'yes' consent forms for vaccination as part  
45 of a local government council vaccine program was the primary outcome for this  
46 trial. Return rates were compared between intervention and control schools and to  
47 historical return rates.  
48  
49  
50  
51

52  
53  
54 RESULTS: Secondary school students (n=3087) from 19 schools participated.  
55 Compared to historical returns, a small global reduction in 'yes' responses to consent  
56 forms was observed across all schools of -4.21% in HPV consent 'yes' responses and -  
57  
58  
59  
60

1  
2  
3  
4 4.69% for DTPA. No difference between the experimental and control groups was  
5  
6 observed.

7  
8  
9  
10 CONCLUSIONS: Low consent 'yes' rates and reduction in consent rates  
11 between 2018 and 2019 for all groups are concerning. This finding highlights the  
12 need for behaviour change interventions across all groups to increase vaccine  
13 confidence. Lack of effect of incentivization with Vaxcards in this pilot study may  
14 have been due to the timing of receiving the cards (after the decision to vaccinate  
15 had been made, not before) and the limited intensity of the intervention. Optimizing  
16 the timing and the intensity of exposure to Vaxcards could improve the outcome  
17  
18  
19  
20  
21  
22  
23  
24  
25  
26  
27

#### 28 Strengths and Limitations of this study

- 29  
30 - This trial was also conducted in a real world, pragmatic setting. Behavior change  
31 interventions are complex in their nature due to the ways in which behaviors  
32 develop in different contexts for different individuals.  
33  
34 - A larger study considering all these things is needed to more definitively determine  
35 efficacy of Vaxcards as a standalone intervention when delivered as an ethical  
36 incentive for vaccination.  
37  
38 - reward of Vaxcards for returning a consent card regardless of response may mean  
39 the incentive to return a form consenting 'yes' was diluted, impacting the main  
40 outcome measured.  
41  
42 -It may not have been able to effectively control for bias in this study and so there  
43 are lessons for future studies of Vaxcards and of vaccine hesitancy in schools for a  
44 larger trial. There may have been an unrecorded data-reporting lag by the council if  
45 they were still waiting for consent cards to come in retrospectively after following  
46 up students within schools.  
47  
48  
49  
50  
51  
52  
53  
54  
55  
56  
57  
58  
59  
60

## Background

Vaccines are a safe and efficacious preventive measure for many illnesses. Despite a long history and evidence of safety and effectiveness, vaccination rates are variable depending on geography, socioeconomic status, and confidence in vaccination<sup>1-4</sup>. Education, incentives for vaccination, and engagement with those who are hesitant to vaccinate are critical areas to investigate in order to increase vaccination rates<sup>4</sup>.

Vaccination rates vary globally but dip below targeted goals for vaccine coverage in many advanced economies including Australia, where vaccination coverage is around 90–94%<sup>5</sup>. Within Australia, there is variation in vaccine coverage between states. Meanwhile, within states there can be substantial regional variation<sup>5</sup>. Growing understanding from social network analysis shows clustering of vaccine refusal and lowering herd immunity, potentially providing focal points for outbreaks.<sup>6-8</sup>

Incentivizing vaccination is a common practice in population health programs.<sup>9-12</sup> It has been shown that monetary and non-monetary incentives improve vaccination uptake by up to three times<sup>13</sup>. A Cochrane review of strategies to improve vaccine uptake in adolescents showed health education, class-based school vaccine strategy, multi-component provider interventions and targeting parents and financial incentives may all improve uptake<sup>14</sup>.

Recent government programs within Australia implemented in 2001 such as 'no jab, no play' and 'no jab, no pay', involve withholding childcare or welfare payments from parents of unvaccinated children. The aim with these programs is to deter vaccination avoidance by withholding financial support to families eligible for these schemes<sup>15</sup>. This strict approach appears to increase catch-up vaccine status, especially in lower socioeconomic groups<sup>16</sup>, but the full implication on longer term

1  
2  
3  
4 vaccine trust and confidence is not understood. Other research has suggested it is  
5 unclear whether this punitive approach is effective <sup>15,17</sup>. Three percent of children  
6 aged 1-6 years are affected by registered or presumptive (unregistered) vaccination  
7 objection, which suggests that the overall impact of vaccination objection on  
8 vaccination rates has remained largely unchanged <sup>17</sup>.  
9  
10  
11  
12  
13  
14  
15

16 In Australia, the two main vaccines for adolescents are for HPV and  
17 Diphtheria, tetanus and pertussis (DtPa), received at age 12-13. Adolescent HPV  
18 vaccine coverage in females for first second and third doses are 86%, 83% and 78%  
19 respectively; while rates for males are 78%, 75% and 67%<sup>18</sup>. For older children, such  
20 as adolescents who receive vaccinations in Australian secondary schools, the return  
21 of the consent form is a major limiting factor in the rate of vaccine uptake <sup>19</sup>.  
22 Interventions to incentivize return of this consent form might improve rates of  
23 vaccination delivered through this program.  
24  
25  
26  
27  
28  
29  
30  
31  
32  
33

34 Large vaccination programs, such as in schools, rely on simple systems to  
35 provide informed consent to participate in the programs. Ethically, individuals must  
36 understand the risks and benefits of vaccination and organisations must gain  
37 consent before invasive procedures like intramuscular injections <sup>20</sup>. The informed  
38 consent process can be a barrier to participation in these programs and result in  
39 missed opportunities for vaccination <sup>21</sup>. Students in the state of Victoria, Australia,  
40 are provided a consent card prior to vaccination that their parents must sign and  
41 return in order to receive the HPV and DtPa vaccines around age 12, at their school.  
42 This occurs in the first year of their secondary schooling. Depending on the local  
43 region, students are provided this form from one to six months in advance,  
44 determined by their school. This means sometimes they can transition from primary  
45 to secondary school during the time period in which they are required to return the  
46 consent form. Many forms are lost, forgotten or deprioritised during this transition  
47 period and there is little incentive for the student or parent to return the form other  
48  
49  
50  
51  
52  
53  
54  
55  
56  
57  
58  
59  
60



1  
2  
3  
4 than the benefit of receiving the vaccination <sup>21</sup>. Some vaccine programs monetarily  
5 incentivize schools or parents to attain minimum rates of consent form return;  
6  
7 however, this school level incentivization has limited impact on target vaccination  
8  
9 levels <sup>22</sup>.

10  
11  
12  
13  
14 The school vaccination program is a target area for interventions that can help  
15 increase vaccination rates. However, there is no consensus as to what interventions  
16 are most effective to incentivize and educate about vaccination in adolescents. The  
17  
18 Cochrane review called for more understanding of adolescent specific hesitancy and  
19  
20 targeted interventions that are class-based, multimodal, use appropriate incentives  
21  
22 and involve health-education delivery <sup>14</sup>. All of these are a potentially modifiable by  
23  
24 Vaxcards - a collectable, educational table-top card game.  
25  
26  
27  
28  
29

30 Collectables and gamification are educational tools that can help children  
31 engage with learning, generate discussion, and provide incentive to engage with the  
32 content being delivered <sup>23 24</sup>. This medium of education increases motivation and  
33 engagement <sup>23</sup>. The collectable card game 'Vaxcards', has cards with characters  
34 based on diseases that children are vaccinated against. Vaxcards was launched after  
35 a successful crowdfunding campaign in 2016, and its viability as a stand-alone game  
36 with educational quality is shown by being listed as a staff pick new games award  
37 on Kickstarter and by being selected in the National Serious games working group<sup>25</sup>.  
38 Within the health community it has attracted significant interest, being the topic of a  
39 top shared and read article on the Bill & Melinda Gates Foundation supported GAVI  
40 website and the focus of a feature article in *The Lancet* <sup>26</sup>. The authors write,  
41  
42 "Vaxcards appear to be an innovative card game for children, but beneath that they  
43 may have the potential to overcome some of the behavioral barriers when  
44 incorporated with existing vaccination programs".  
45  
46  
47  
48  
49  
50  
51  
52  
53  
54  
55  
56  
57  
58  
59  
60

1  
2  
3  
4 The objective of the present trial is to pilot test the use of Vaxcards as an  
5 ethical, non-monetary incentive, to support school vaccination programs for  
6 secondary school students. It will determine if the return of the consent form for  
7 vaccination improves when the card game is offered as an incentive. We hypothesize  
8 that students in schools that were incentivised to return the vaccination consent form  
9 will show improved vaccination consent form return rates.  
10  
11  
12  
13  
14  
15  
16  
17  
18  
19

## 20 Methods

21  
22 The study will be reported using Consort guidelines and extensions for  
23 cluster and pragmatic trials<sup>27</sup>.  
24  
25  
26  
27

### 28 a) Trial design

29  
30 A pragmatic, cluster randomised controlled trial<sup>28</sup> involving secondary  
31 schools within a large local government area in the outer south east of Melbourne,  
32 Australia. Block randomisation was used to allocate participating schools to one of  
33 two groups forming experimental and control groups.  
34  
35  
36  
37  
38  
39

### 40 b) Participants and setting

41  
42 The participating local government area is in southeast Victoria, Australia, on  
43 the fringes of the state capital city of Melbourne. It encompasses a diverse cultural  
44 population of high and low socioeconomic status families as well as being one of the  
45 highest growth areas in the state. The vaccination consent rate within the catchment  
46 schools in 2018 varied from 64.6% to 91.3%, which is below the WHO and Australian  
47 government target of 95% coverage. At this age, children in this area are receiving  
48 the Australian Schedule vaccination for HPV and Diphtheria, tetanus and pertussis  
49 booster. It is also a target age for collectable card games.  
50  
51  
52  
53  
54  
55  
56  
57  
58  
59

### 60 c) Control arm.

1  
2  
3  
4 The control arm took part in the normal processes of the school-based  
5  
6 vaccination program. In this arm, parents of children received information about the  
7  
8 vaccination program during term 4 of the preceding school year as usual. They were  
9  
10 asked to sign and return a consent form to the school before the vaccination program  
11  
12 occurs early in term 1 of the next school year. The local government council records  
13  
14 return rates of consent to vaccination forms.  
15  
16

#### 17 18 Experimental arm.

19  
20 Students underwent the normal government vaccination process as above. At  
21  
22 the time of consent form distribution, children and their parent/caregiver were  
23  
24 provided a handout advising them that children who return the consent form will be  
25  
26 given a “basic pack” of the card game Vaxcards. This form contained an explanatory  
27  
28 statement about the study and offered the chance for parent or carer to decline  
29  
30 participation of their child in the study or to contact the research team for further  
31  
32 information.  
33  
34

35  
36 The school staff member responsible for coordinating the government  
37  
38 vaccination program provided one basic pack of Vaxcards to children who returned  
39  
40 a vaccination consent form in the intervention schools in February 2019. Consistent  
41  
42 with the pragmatic nature of the trial, the school determined which staff member  
43  
44 was responsible for this. The card pack was handed to each student who returned  
45  
46 his or her vaccination consent form, regardless of response or consent to vaccination.  
47  
48 This was done to not exclude non-consenting students from the intervention because  
49  
50 they could change their consent status any time prior to vaccination.  
51  
52

#### 53 54 Proposed intervention,

55  
56 Vaxcards packs contain 13 disease character cards that represent the diseases  
57  
58 vaccinated against during the routine childhood immunisation schedule in Australia  
59  
60 (measles, mumps, rubella, diphtheria, tetanus, pertussis, HPV, rotavirus,

1  
2  
3  
4 haemophilus B, hepatitis B, meningococcal, pneumococcal, varicella). Each character  
5 is designed to anthropomorphise the disease, with traits of symptoms of the disease  
6 and information or 'powers' that reflect the microbiology of the disease, the vector or  
7 mode of transmission and information on global incidence and mortality that reflect  
8 how powerful the character is within the game. Each player collects their own set of  
9 disease characters and exchanges addition, subtraction and multiplier game  
10 mechanics to influence a sliding scale of 'hit points'. The game is designed so disease  
11 characters maintain their scientific names and encourage the use of terminology and  
12 symptomatology amongst players. The game play is light-hearted in nature and  
13 nonviolent or threatening.  
14  
15  
16  
17  
18  
19  
20  
21  
22  
23  
24  
25

#### 26 d) Outcomes

27  
28 The primary outcome was consent to vaccination based on returned council  
29 consent forms, routinely collected by local government councils.  
30  
31  
32  
33

#### 34 e) Procedure for randomisation and blinding

35  
36 A statistician, blinded to the school characteristics, conducted the  
37 randomisation and allocation sequence performed, by assigning clusters to  
38 interventions. It was not possible to blind participants to the intervention; however,  
39 they were blinded to information about the existence of a control/experimental  
40 group until after vaccination. Block randomisation determined allocation of  
41 participating schools to one of two groups forming experimental and control groups.  
42 To ensure balanced proportions of these school characteristics in each cluster in the  
43 test and control groups we stratified the randomisation by school based upon  
44 number of year 7 student enrolments ('less than 100' and 'more than 100') and  
45 consent return (<90% and ≥90%). After randomisation and allocation to groups, the  
46 lead investigator, who was not blinded, consented and recruited schools to  
47 participate. The statistician remained blinded.  
48  
49  
50  
51  
52  
53  
54  
55  
56  
57  
58  
59  
60

1  
2  
3  
4 Initially, two schools included in the randomisation process were not  
5 identified as specialised schools for children with intellectual disability (ID 25 and  
6 12). Once identified, these two schools were removed from the original  
7 randomisation allocation (as both were randomly allocated to the control group)  
8 because a likely confounder was student type. Instead of excluding these two  
9 schools, reallocation occurred after creation of another stratification factor (special  
10 needs) of one school to the test group and other to control. For pragmatic reasons,  
11 the school scheduled to begin the vaccination program later in the year than the  
12 other school was assigned to the test group, as this gave the researchers more time to  
13 introduce the intervention. The control school was the other school.  
14  
15  
16  
17  
18  
19  
20  
21  
22  
23  
24  
25

#### 26 f) Sample size and pre-trial power calculation

27  
28 Within the 31 schools in the local government council, 25 were participating  
29 in the 2019 local government vaccination program. Of these, in 2018, there were 12  
30 schools in this council area with enrolments of less than n=100 year 7 students aged  
31 12-13 and n=11 schools with 100 or more. There were eight schools with a historical  
32 consent return rate of less than 90%.  
33  
34  
35  
36  
37

38 Of the 31 eligible schools, six schools were not participating in the council  
39 vaccination program and were excluded (Figure 1). One school had already returned  
40 the council consent forms and was excluded. This school (from the experimental  
41 group) was replaced by another school from the same strata, randomly selected from  
42 the control group. Of the remaining 24 schools, 19 agreed to participate in the trial  
43 and seven were randomised to the experimental arm (n=965 students) and 12 to the  
44 control arm (n=2122 students).  
45  
46  
47  
48  
49  
50  
51  
52

53 A pre-study power calculation was conducted assuming 23 clusters of school  
54 involvement. The study had ample power (>95%) to detect a change in proportion of  
55 5%. The power calculation was done using Stata statistical software for a stepped-  
56 wedge trial with 23 clusters defined at the level of the school. The primary outcome  
57  
58  
59  
60

1  
2  
3 measure was the return of the consent form from 120 students per school,  
4  
5 significance level set at 0.05, intraclass correlation coefficient (ICC) within schools of  
6  
7 0.3, approximately half the schools receiving the intervention (ie steps=1) , and data  
8  
9 examined at two time points (baseline (returns in 2018), year 1 (returns in 2019)).  
10  
11  
12  
13

#### 14 g) Data collection methods, instruments used:

15  
16  
17 The primary outcome data was de-identified, routinely reported local  
18  
19 government council data on consent form returns which was provided to the  
20  
21 researchers by the local government council. Return of consent cards and number  
22  
23 consenting to vaccination was reported to the researchers for analysis.  
24  
25  
26  
27

#### 28 h) Patient and Public Involvement

29  
30 No patients were involved in the study. Stakeholders of teachers and council  
31  
32 vaccination services were involved in the design of the trial to best fit in the existing  
33  
34 vaccine schedule without disrupting workflow of the current consent card collection  
35  
36 and vaccination process.  
37  
38  
39

#### 40 Data analysis

41  
42 The main outcomes were the consent rate change (HPV, DaPa, both) for each school,  
43  
44 which was calculated by the comparison between the council collected vaccine  
45  
46 consent rates from the baseline in 2018 compared to the trial year of 2019.

47  
48 We used linear regression to investigate each of these three outcomes with three  
49  
50 bivariate independent variables of 2018 school students in year 7 (>100; <100),  
51  
52 previous 2018 consent form return rates (<90%; >90%), and intervention group  
53  
54 allocation (test; control).  
55  
56  
57

58 We used Stata 16 (Stata Corp, College Station, TX) for the regression analyses.  
59  
60

#### h) Participant flow

Several schools declined the invitation to be involved in the trial. The most common reasons included they did not participate in the council vaccine program (six) were too busy or had other commitments (two), the research topic was 'too sensitive' (three) and one school requested the investigators seek an additional approval from a Catholic schools research ethics committee which was unable to be attained within the timeframe of the study (one).

Figure 1 PRISMA chart showing the flow of participant's through the RCT

#### Results

The trial involved a total of 3087 secondary school students in 19 school clusters. Consent forms were returned from n=2754 students. Of those returned n=2081 were marked 'yes' comprising 75.6% of all returned HPV forms (range between schools= 50.3% - 90.6%) and n=2113 (76.7%) of all returned DaPa forms (range between schools= 54.6% - 92.2%) in 2019. There were 327 outstanding consent cards that were not returned according to council data.

Subgroup analysis demonstrated a significant improvement in consent to vaccination between 2018-2019 for students from small schools (<100 students in the year level). The combined increase in returned 'yes' forms for both vaccines in these schools was 4.49% (10.99% better than larger schools, with a coefficient -0.11 for school size on vaccination rate change, p. 0.04 CI(-0.22 - -0.01)). There was no

significant difference on sub-group analysis of prior vaccination rates in schools. (see table 1)

Compared to the historical comparison, there was a mean global reduction in 'yes' responses in returned consent forms across all schools of -4.21% for HPV and -4.69% for DaPa. The average 'yes' response (ie. a positive response consenting to participation in vaccination) across all schools for the previous year (2018) was 79.77% for HPV (range of 56.6% - 90.72%) and 81.42% for DaPa (range of 61.54% - 95.88%). There was no statistically significant difference between the change in proportion of returned consent forms between experimental and control groups with a consent to vaccination. (see table 2)

There was considerable intra-school variation in the proportion responding 'yes' between 2018 and 2019. 'Yes' consent for HPV forms ranged from -21.5% to +34.02%, and yes consent for DaPa ranged from -17.27% to +29.92%.

**Table 1: Analysis vaccination consent rate changes between Intervention and sub-strata.**

| HPV <sup>^</sup>      |                    |                     |        |      |                      |
|-----------------------|--------------------|---------------------|--------|------|----------------------|
|                       | % change           | Difference          | Coef.  | p.   | 95% CI               |
|                       | control            | intervention        |        |      |                      |
| <b>Intervention</b>   | -2.05%             | -2.74%              | 0.69%  | 0.37 | -0.05 (-0.16 - 0.07) |
|                       | <100 students      | 100+ students       |        |      |                      |
| <b>Size of school</b> | 3.98%              | -6.33%              | 10.31% | 0.06 | -0.11 (-0.22 - 0.01) |
|                       | Low consent school | High consent school |        |      |                      |



|                              |                    |                     |              |           |                       |
|------------------------------|--------------------|---------------------|--------------|-----------|-----------------------|
| Previous consent rate        | 0.44%              | -6.65%              | 7.10%        | 0.28      | -0.06 (-0.17 - 0.05)  |
| <b>DtPa*</b>                 |                    |                     |              |           |                       |
|                              | <b>% change</b>    | <b>Difference</b>   | <b>Coef.</b> | <b>p.</b> | <b>95% CI</b>         |
|                              | <b>control</b>     | <b>intervention</b> |              |           |                       |
| Intervention group           | -2.35%             | -1.79%              | -0.57%       | 0.43      | -0.04 (-0.15 - 0.07)  |
|                              | <100 students      | 100+ students       |              |           |                       |
| Size of school               | 5.00%              | -6.67%              | 11.68%       | 0.03      | -0.12 (-0.23 - -0.01) |
|                              | Low consent school | High consent school |              |           |                       |
| previous consent rate        | 0.89%              | -6.89%              | 7.78%        | 0.2       | -0.06 (-0.17 - 0.04)  |
| <b>Combined DtPa* + HPV^</b> |                    |                     |              |           |                       |
|                              | <b>% change</b>    | <b>Difference</b>   | <b>Coef.</b> | <b>p.</b> | <b>95% CI</b>         |
|                              | <b>control</b>     | <b>intervention</b> |              |           |                       |
| Intervention group           | -2.20%             | -2.26%              | 0.06%        | 0.39      | -0.05 (-0.15 - 0.06)  |
|                              | <100 students      | 100+ students       |              |           |                       |
| Size of school               | 4.49%              | -6.50%              | 10.99%       | 0.04      | -0.11 (-0.22 - -0.01) |
|                              | Low consent school | High consent school |              |           |                       |
| previous consent rate        | 0.67%              | -6.77%              | 7.44%        | 0.22      | -0.1 (-0.17 - 0.04)   |

^HPV = Human Papilloma Virus vaccine

\*DtPa = Diphtheria, Tetanus and Pertussis vaccine

Table 2: Combined intervention and control school consent rate changes

| HPV                       | 2018 average consent | 2019 average consent | Difference     |
|---------------------------|----------------------|----------------------|----------------|
| consent all schools       | 79.7%                | 75.6%                | -4.2%          |
| range                     | 56.6 - 90.7%         | 50.3 - 90.6%         | -21.5 - 34.0%  |
| <b>DtPa</b>               |                      |                      |                |
| consent all schools       | 81.4%                | 76.7%                | -4.7%          |
| range                     | 61.5 - 95.9%         | 54.5 - 92.2%         | -17.3 - 29.9 % |
| <b>Combined HPV +DtPa</b> |                      |                      |                |
| consent all schools       | 80.6%                | 75.9%                | -4.75%         |
| Range                     | 59.4 - 93.3%         | 52.4 - 91.4%         | -19.4 - 32.0%  |

## Discussion

The major finding from this data is the low consent rates and the global reduction in consent rates between 2018 and 2019 for both the control and experimental groups. Consent for vaccination is far below target range specified by the local government council area in which this trial was undertaken of 95%. This highlights the need for interventions to increase these rates and prevent further vaccine hesitancy in the setting of public-school vaccination programs.

In order to improve vaccination rates towards target levels of >95%, we must improve the low consent rates of these students. Consent is required by these school vaccination programs in order to vaccinate the children, so without targeting the barriers to consenting, we will not improve actual rates of vaccinated individuals in the student population.

1  
2  
3  
4  
5  
6 Vaxcards can be considered a desirable and 'ethical', non-monetary incentive to  
7  
8 influence behavior change that is directed toward the adolescents being vaccinated.  
9  
10 Collectables and gamification are important educational tools that can help  
11  
12 children engage with learning, generate discussion, and provide an incentive  
13  
14 to engage with the content being delivered<sup>23</sup>. The theoretical underpinnings of  
15  
16 Vaxcards as an intervention is multifaceted. This is represented in our logic model of  
17  
18 the theory of change (Figure 2). Initially, the use of receiving Vaxcards as an  
19  
20 incentive to return consent forms acts, from a behavioral standpoint, as a reward. As  
21  
22 we previously mentioned, rewards have shown good effect in increasing vaccine  
23  
24 uptake, but there have been no tangible take-home interventions directly designed  
25  
26 for this age group. Secondly, Vaxcards acts as a social tool for students, parents,  
27  
28 peers and teachers to interact and lower the barrier to discussing topics around  
29  
30 vaccination and diseases. Thirdly, it utilizes these educational points throughout the  
31  
32 gameplay to increase knowledge of the infectious diseases in the content of the  
33  
34 game, increasing salience of their risks and the benefit of preventative vaccination  
35  
36 against them. This requires the buy in of government or organisations to distribute  
37  
38 Vaxcards alongside vaccination programs, and school stakeholders to also deliver  
39  
40 and engage with the tool. The timely delivery and playing of the game should  
41  
42 theoretically result in increased vaccine consent and uptake, conversations around  
43  
44 vaccines, knowledge of the diseases and increase vaccine confidence. The  
45  
46 intervention drew on principles of use of incentive, and took a pragmatic approach  
47  
48 adding to existing council and school strategies to improve consent return rates, but  
49  
50 was unable to impact return rates in this trial.  
51  
52  
53

54 Figure 2: Logic Model (or theory of change) for Vaxcards.  
55  
56  
57  
58  
59  
60

1  
2  
3  
4 The first limitation to improving consent is reducing the logistical barriers to  
5 returning the consent card. The card is provided in some schools the year before the  
6 vaccination occurs. This means that some students receive the cards in their last year  
7 of primary school, to bring home and have their parent's sign, only to attempt  
8 returning the card to the child's school when the new school year begins. Many  
9 students change schools during these two years and there is a risk of lost to follow-  
10 up when changing school systems.  
11  
12  
13  
14  
15  
16  
17  
18  
19

20 Smaller schools did show a significant improvement in consent for vaccination,  
21 irrespective of previous vaccination consent levels. One explanation may be that  
22 smaller schools are better placed to communicate health promotion activities to  
23 students and parents given the individual concerns vaccination can generate. It  
24 could explain why larger schools are having trouble improving vaccine consent  
25 given the large difference between the one-year time difference and the concurrent  
26 emergence of hesitancy in the community.  
27  
28  
29  
30  
31  
32  
33  
34  
35

36 There is also an element of timing in the provision of the incentive and the intensity  
37 of the intervention. Perhaps exposure to the intervention earlier will lead to more of  
38 an impact. For example, receiving the Vaxcards with the educational packet from the  
39 council instead of as a reward for returning consent forms will enable a chance of  
40 impacting vaccine hesitancy to those who are most likely to require it, who never  
41 returned consent cards and were therefore not exposed to the intervention. It is also  
42 likely that the intensity was not enough. In this study we do not know how the  
43 participants used the cards, whether they engaged with the information in the cards,  
44 or had an opportunity to clarify their understanding to learn more about them.  
45  
46  
47  
48  
49  
50  
51  
52  
53  
54 Introduction or integration of the game in science or health classes could reinforce  
55 the educational aspects and impact on vaccine uptake, as evidenced in the Cochrane  
56 review of adolescent vaccine interventions <sup>14</sup>.  
57  
58  
59  
60

1  
2  
3  
4 In a pragmatic sense it is unlikely a single intervention alone will largely change  
5 complex paradigm like vaccine hesitancy. In future trials, we would like to  
6 investigate the intervention in combination with other incentives and educational  
7 material to determine if a multifaceted approach can shift consent rates.  
8  
9  
10  
11  
12

### 13 14 Strengths and Limitations

15  
16 The outcomes of this trial were impacted by the unexpectedly large deviation in  
17 vaccination consent between the clusters of schools. The sample size was based in  
18 part on an estimated effect size, which may have been too optimistic. A larger study  
19 considering all these things is needed to more definitively determine efficacy of  
20 Vaxcards as a standalone intervention when delivered as an ethical incentive for  
21 vaccination. We also do not know the vaccine outcome of children who did not  
22 return a consent form, declined school vaccine or ticked 'had elsewhere'. It is  
23 possible these students did indeed get vaccinated outside the school program and  
24 the 'consent' rates do not infer true vaccine status of the group. Lastly, all students  
25 who returned consent cards were given a pack of Vaxcards, regardless of response.  
26 This decision was made pragmatically by the schools to not discriminate based on  
27 responses and to include all students. It also aligned with incentives of the school,  
28 which are measured in total consent card return rate, not consent 'yes' return rates.  
29 This is an interesting point to possibly consider as a target to increase consent 'yes'  
30 rates, to change school performance indicators to align with public health outcomes  
31 rather than the return of forms regardless of outcome. Nevertheless, reward of  
32 Vaxcards for returning a consent card regardless of response may mean the  
33 incentive to return a form consenting 'yes' was diluted, impacting the main outcome  
34 measured.  
35  
36  
37  
38  
39  
40  
41  
42  
43  
44  
45  
46  
47  
48  
49  
50  
51  
52  
53  
54  
55

56 A further limitation of this study includes the insufficient cluster sizes  
57 required for statistical assessment. Also, it may not have been able to effectively  
58 control for bias in this study and so there are lessons for future studies of Vaxcards  
59  
60

1  
2  
3  
4 and of vaccine hesitancy in schools for a larger trial. There may have been an  
5  
6 unrecorded data-reporting lag by the council if they were still waiting for consent  
7  
8 cards to come in retrospectively after following up students within schools.  
9

10  
11  
12 This trial was also conducted in a real world, pragmatic setting. Behavior  
13  
14 change interventions are complex in their nature due to the ways in which behaviors  
15  
16 develop in different contexts for different individuals.<sup>29 30</sup> The design of this trial  
17  
18 may also have diluted the effect if the intervention efficacy that may impact the  
19  
20 results. For this reason, a much larger trial involving more clusters to account for  
21  
22 this dilution effect would be suitable to further assess the intervention.  
23  
24  
25

## 26 Conclusions

27  
28 Vaxcards is a novel intervention that addresses many recommendations made  
29  
30 in the recent Cochrane review of effective interventions to improve vaccine uptake  
31  
32 in adolescents<sup>14</sup>. These elements include being an ethical incentive that can be  
33  
34 incorporated into other health education and health promotion initiatives as part of  
35  
36 multi-component approaches to support vaccine uptake amongst school-aged  
37  
38 children. This potential requires further investigation to assess impact on vaccine  
39  
40 uptake and vaccine confidence. A combination of optimizing the timing and the  
41  
42 intensity of the intervention as part of a multimodal approach will be required to  
43  
44 significantly shift hesitancy and improve consent rates and ultimately uptake of  
45  
46 vaccination.  
47  
48  
49

## 50 Conflicts of interest

51  
52 The lead author is the creator of Vaxcards that supplied the card games for  
53  
54 evaluation in this study and this was disclosed to the participating schools and  
55  
56 councils involved in the vaccination project. This interest will be disclosed in all  
57  
58 subsequent research output.  
59  
60

1. Black S, Rappuoli R. A crisis of public confidence in vaccines: American Association for the Advancement of Science, 2010.
2. Leask J. Target the fence-sitters. *Nature* 2011;473(7348):443-45.
3. Larson HJ, Jarrett C, Eckersberger E, et al. Understanding vaccine hesitancy around vaccines and vaccination from a global perspective: a systematic review of published literature, 2007–2012. *Vaccine* 2014;32(19):2150-59.
4. Browne M. Epistemic divides and ontological confusions: The psychology of vaccine scepticism. *Human vaccines & immunotherapeutics* 2018;14(10):2540-42.
5. Health Legislation Amendment Act 1983, 1983.
6. Liu F, Enanoria WT, Zipprich J, et al. The role of vaccination coverage, individual behaviors, and the public health response in the control of measles epidemics: an agent-based simulation for California. *BMC public health* 2015;15(1):447.
7. Salathé M, Bonhoeffer S. The effect of opinion clustering on disease outbreaks. *Journal of The Royal Society Interface* 2008;5(29):1505-08.
8. Onnela J-P, Landon BE, Kahn A-L, et al. Polio vaccine hesitancy in the networks and neighborhoods of Malegaon, India. *Social science & medicine* 2016;153:99-106.
9. Topp L, Day CA, Wand H, et al. A randomised controlled trial of financial incentives to increase hepatitis B vaccination completion among people who inject drugs in Australia. *Preventive Medicine* 2013;57(4):297-303.
10. Seal KH, Kral AH, Lorvick J, et al. A randomized controlled trial of monetary incentives vs. outreach to enhance adherence to the hepatitis B vaccine series among injection drug users. *Drug and Alcohol Dependence* 2003;71(2):127-31.
11. Unti LM, Coyle KK, Woodruff BA, et al. Incentives and motivators in school-based hepatitis B vaccination programs. *Journal of School Health* 1997;67(7):265-68.
12. Dale LP, White L, Mitchell M, et al. Smartphone app uses loyalty point incentives and push notifications to encourage influenza vaccine uptake. *Vaccine* 2019;37(32):4594-600.
13. Achat H, McIntyre P, Burgess M. Health care incentives in immunisation. *Australian and New Zealand journal of public health* 1999;23(3):285-88.
14. Abdullahi LH, Kagina BM, Ndze VN, et al. Improving vaccination uptake among adolescents. *Cochrane Database of Systematic Reviews* 2020(1)
15. Beard FH, Hull BP, Leask J, et al. Trends and patterns in vaccination objection, Australia, 2002–2013. *Medical Journal of Australia* 2016;204(7):275-75.
16. Hull BP, Beard FH, Hendry AJ, et al. “No jab, no pay”: catch-up vaccination activity during its first two years. *Medical Journal of Australia* 2020
17. Beard FH, Leask J, McIntyre PB. No Jab, No Pay and vaccine refusal in Australia: the jury is out. *Medical Journal of Australia* 2017;206(9):381-83.
18. Brotherton JM, Bloem PN. Population-based HPV vaccination programmes are safe and effective: 2017 update and the impetus for achieving better global coverage. *Best practice & research Clinical obstetrics & gynaecology* 2018;47:42-58.
19. Rockliffe L, McBride E, Heffernan C, et al. Factors Affecting Delivery of the HPV Vaccination: A Focus Group Study With NHS School-Aged Vaccination Teams in London. *The Journal of School Nursing* 2018:1059840518792078.
20. Soekhai V, de Bekker-Grob EW, Ellis AR, et al. Discrete Choice Experiments in Health Economics: Past, Present and Future. *Pharmacoeconomics* 2019;37(2):201-26. doi: 10.1007/s40273-018-0734-2 [published Online First: 2018/11/06]
21. Ward K, Quinn H, Bachelor M, et al. Adolescent school-based vaccination in Australia. *Communicable diseases intelligence quarterly report* 2013;37(2):E156-67.
22. Wigham S, Ternent L, Bryant A, et al. Parental financial incentives for increasing preschool vaccination uptake: systematic review. *Pediatrics* 2014;134(4):e1117-e28.
23. Gamification in education; 2014. Proceedings of 9th International Balkan Education and Science Conference.

- 1  
2  
3 24. DS Epstein AZ, J Enticott, CA Barton. Designing tabletop board game elements and gamification  
4 interventions for health behavior change: a realist review and proposed framework. *JMIR*  
5 *Serious Games* 2020(under review)  
6  
7 25. SGANZ. Serious Games Australia and New Zealand.  
8 26. Tang PK. Vaccination and immunisation: can they be taught to children? *The Lancet Child &*  
9 *Adolescent Health* 2017;1(1):14.  
10 27. Campbell MK, Piaggio G, Elbourne DR, et al. Consort 2010 statement: extension to cluster  
11 randomised trials. *Bmj* 2012;345:e5661.  
12 28. Roland M, Torgerson DJ. Understanding controlled trials: What are pragmatic trials? *Bmj*  
13 1998;316(7127):285.  
14 29. Greenhalgh T, Plsek P, Wilson T, et al. Response to 'The appropriation of complexity theory in  
15 health care'. *Journal of Health Services Research & Policy* 2010;15(2):115-17.  
16 30. Shiell A, Hawe P, Gold L. Complex interventions or complex systems? Implications for health  
17 economic evaluation. *Bmj* 2008;336(7656):1281-83.  
18  
19

20 Figure legend:

21  
22 Figure 1 PRISMA chart showing the flow of participant's through the RCT

23  
24 Figure 2 Logic Model (or theory of change) for Vaxcards.  
25  
26  
27  
28  
29  
30  
31  
32  
33  
34  
35  
36  
37  
38  
39  
40  
41  
42  
43  
44  
45  
46  
47  
48  
49  
50  
51  
52  
53  
54  
55  
56  
57  
58  
59  
60



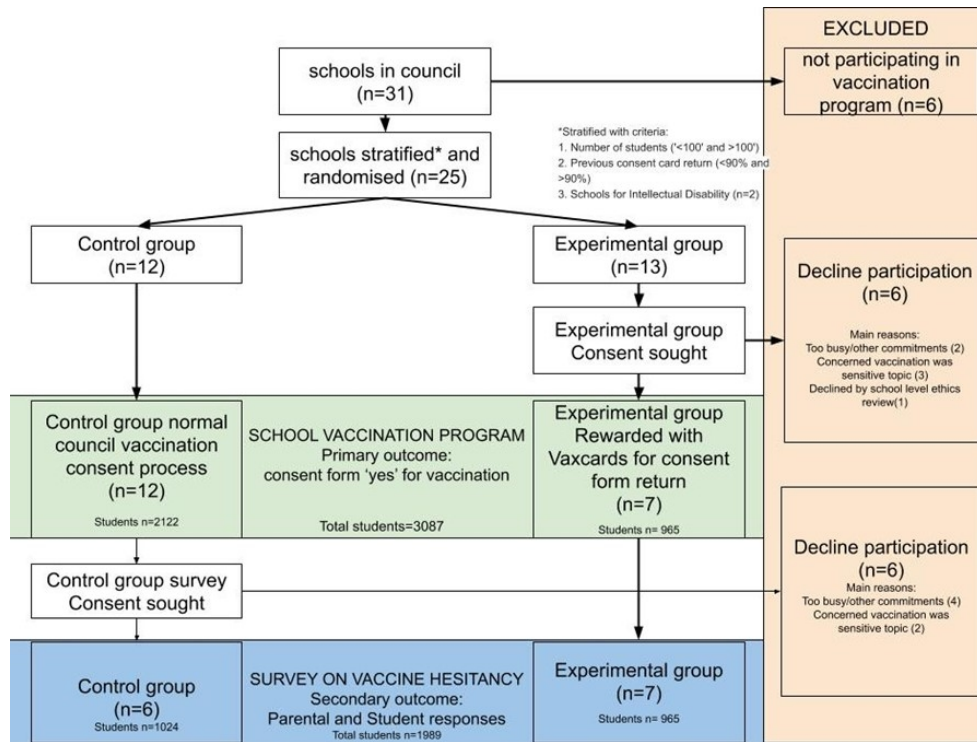

Figure 1 PRISMA chart showing the flow of participant's through the RCT

159x119mm (146 x 146 DPI)

1  
2  
3  
4  
5  
6  
7  
8  
9  
10  
11  
12  
13  
14  
15  
16  
17  
18  
19  
20  
21  
22  
23  
24  
25  
26  
27  
28  
29  
30  
31  
32  
33  
34  
35  
36  
37  
38  
39  
40  
41  
42  
43  
44  
45  
46  
47  
48  
49  
50  
51  
52  
53  
54  
55  
56  
57  
58  
59  
60

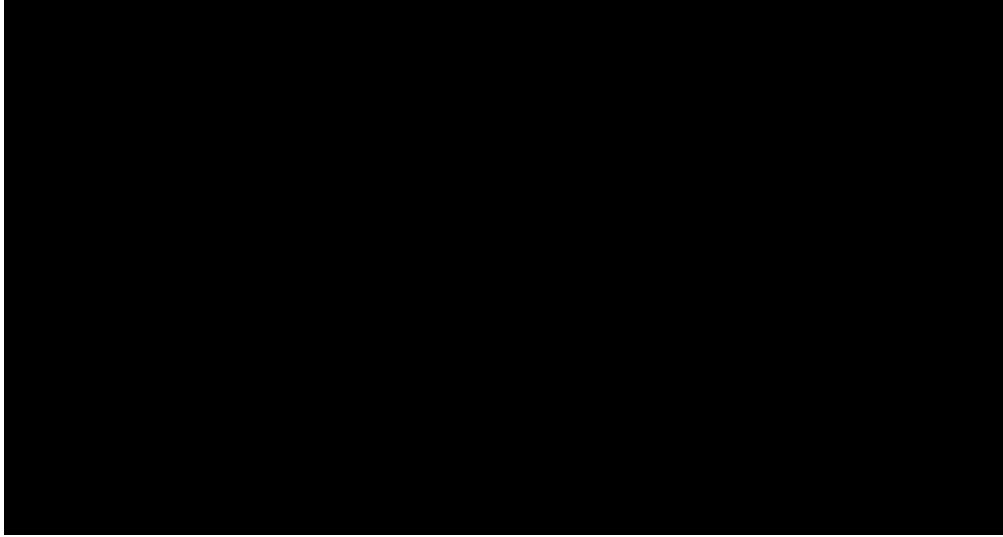

Figure 2 logic model

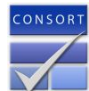

## CONSORT 2010 checklist of information to include when reporting a randomised trial\*

| Section/Topic                    | Item No | Checklist item                                                                                                                                                                              | Reported on page No |
|----------------------------------|---------|---------------------------------------------------------------------------------------------------------------------------------------------------------------------------------------------|---------------------|
| <b>Title and abstract</b>        |         |                                                                                                                                                                                             |                     |
|                                  | 1a      | Identification as a randomised trial in the title                                                                                                                                           | 1                   |
|                                  | 1b      | Structured summary of trial design, methods, results, and conclusions (for specific guidance see CONSORT for abstracts)                                                                     | 2                   |
| <b>Introduction</b>              |         |                                                                                                                                                                                             |                     |
| Background and objectives        | 2a      | Scientific background and explanation of rationale                                                                                                                                          | 4                   |
|                                  | 2b      | Specific objectives or hypotheses                                                                                                                                                           | 6                   |
| <b>Methods</b>                   |         |                                                                                                                                                                                             |                     |
| Trial design                     | 3a      | Description of trial design (such as parallel, factorial) including allocation ratio                                                                                                        | 7                   |
|                                  | 3b      | Important changes to methods after trial commencement (such as eligibility criteria), with reasons                                                                                          | 7                   |
| Participants                     | 4a      | Eligibility criteria for participants                                                                                                                                                       | 7                   |
|                                  | 4b      | Settings and locations where the data were collected                                                                                                                                        | 7                   |
| Interventions                    | 5       | The interventions for each group with sufficient details to allow replication, including how and when they were actually administered                                                       | 8                   |
| Outcomes                         | 6a      | Completely defined pre-specified primary and secondary outcome measures, including how and when they were assessed                                                                          | 9                   |
|                                  | 6b      | Any changes to trial outcomes after the trial commenced, with reasons                                                                                                                       | 10                  |
| Sample size                      | 7a      | How sample size was determined                                                                                                                                                              | 10                  |
|                                  | 7b      | When applicable, explanation of any interim analyses and stopping guidelines                                                                                                                | na                  |
| <b>Randomisation:</b>            |         |                                                                                                                                                                                             |                     |
| Sequence generation              | 8a      | Method used to generate the random allocation sequence                                                                                                                                      | 9                   |
|                                  | 8b      | Type of randomisation; details of any restriction (such as blocking and block size)                                                                                                         | 9                   |
| Allocation concealment mechanism | 9       | Mechanism used to implement the random allocation sequence (such as sequentially numbered containers), describing any steps taken to conceal the sequence until interventions were assigned | 9                   |
| Implementation                   | 10      | Who generated the random allocation sequence, who enrolled participants, and who assigned participants to interventions                                                                     | 9                   |
| Blinding                         | 11a     | If done, who was blinded after assignment to interventions (for example, participants, care providers, those                                                                                | 9                   |

|                                                      |     |                                                                                                                                                   |    |
|------------------------------------------------------|-----|---------------------------------------------------------------------------------------------------------------------------------------------------|----|
|                                                      |     | assessing outcomes) and how                                                                                                                       |    |
|                                                      | 11b | If relevant, description of the similarity of interventions                                                                                       | 8  |
| Statistical methods                                  | 12a | Statistical methods used to compare groups for primary and secondary outcomes                                                                     | 11 |
|                                                      | 12b | Methods for additional analyses, such as subgroup analyses and adjusted analyses                                                                  | 11 |
| <b>Results</b>                                       |     |                                                                                                                                                   |    |
| Participant flow (a diagram is strongly recommended) | 13a | For each group, the numbers of participants who were randomly assigned, received intended treatment, and were analysed for the primary outcome    | 12 |
|                                                      | 13b | For each group, losses and exclusions after randomisation, together with reasons                                                                  | 13 |
| Recruitment                                          | 14a | Dates defining the periods of recruitment and follow-up                                                                                           | 12 |
|                                                      | 14b | Why the trial ended or was stopped                                                                                                                | 12 |
| Baseline data                                        | 15  | A table showing baseline demographic and clinical characteristics for each group                                                                  | 13 |
| Numbers analysed                                     | 16  | For each group, number of participants (denominator) included in each analysis and whether the analysis was by original assigned groups           | 13 |
| Outcomes and estimation                              | 17a | For each primary and secondary outcome, results for each group, and the estimated effect size and its precision (such as 95% confidence interval) | 13 |
|                                                      | 17b | For binary outcomes, presentation of both absolute and relative effect sizes is recommended                                                       | 13 |
| Ancillary analyses                                   | 18  | Results of any other analyses performed, including subgroup analyses and adjusted analyses, distinguishing pre-specified from exploratory         | 13 |
| Harms                                                | 19  | All important harms or unintended effects in each group (for specific guidance see CONSORT for harms)                                             | 12 |
| <b>Discussion</b>                                    |     |                                                                                                                                                   |    |
| Limitations                                          | 20  | Trial limitations, addressing sources of potential bias, imprecision, and, if relevant, multiplicity of analyses                                  | 18 |
| Generalisability                                     | 21  | Generalisability (external validity, applicability) of the trial findings                                                                         | 18 |
| Interpretation                                       | 22  | Interpretation consistent with results, balancing benefits and harms, and considering other relevant evidence                                     | 19 |
| <b>Other information</b>                             |     |                                                                                                                                                   |    |
| Registration                                         | 23  | Registration number and name of trial registry                                                                                                    | 1  |
| Protocol                                             | 24  | Where the full trial protocol can be accessed, if available                                                                                       | 1  |
| Funding                                              | 25  | Sources of funding and other support (such as supply of drugs), role of funders                                                                   | 1  |

\*We strongly recommend reading this statement in conjunction with the CONSORT 2010 Explanation and Elaboration for important clarifications on all the items. If relevant, we also recommend reading CONSORT extensions for cluster randomised trials, non-inferiority and equivalence trials, non-pharmacological treatments, herbal interventions, and pragmatic trials. Additional extensions are forthcoming: for those and for up to date references relevant to this checklist, see [www.consort-statement.org](http://www.consort-statement.org).

# BMJ Open

## Pragmatic Cluster Randomised Control Trial using Vaxcards as an age-appropriate tool to incentivise and educate school students about vaccination

|                                 |                                                                                                                                                                                                                                                                                                               |
|---------------------------------|---------------------------------------------------------------------------------------------------------------------------------------------------------------------------------------------------------------------------------------------------------------------------------------------------------------|
| Journal:                        | <i>BMJ Open</i>                                                                                                                                                                                                                                                                                               |
| Manuscript ID                   | bmjopen-2021-049562.R1                                                                                                                                                                                                                                                                                        |
| Article Type:                   | Original research                                                                                                                                                                                                                                                                                             |
| Date Submitted by the Author:   | 02-Jul-2021                                                                                                                                                                                                                                                                                                   |
| Complete List of Authors:       | Epstein, Daniel; Monash University, Department of General Practice<br>Enticott, Joanne; Monash University Department of General Practice;<br>Southern Synergy,<br>Larson, Heidi; London School of Hygiene and Tropical Medicine,<br>Infectious Disease Eoidemiology<br>Barton, Christopher; Monash University |
| <b>Primary Subject Heading</b>: | Public health                                                                                                                                                                                                                                                                                                 |
| Secondary Subject Heading:      | Public health                                                                                                                                                                                                                                                                                                 |
| Keywords:                       | Paediatric infectious disease & immunisation < PAEDIATRICS, Public health < INFECTIOUS DISEASES, PUBLIC HEALTH                                                                                                                                                                                                |
|                                 |                                                                                                                                                                                                                                                                                                               |

SCHOLARONE™  
Manuscripts

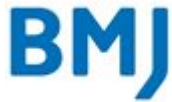

I, the Submitting Author has the right to grant and does grant on behalf of all authors of the Work (as defined in the below author licence), an exclusive licence and/or a non-exclusive licence for contributions from authors who are: i) UK Crown employees; ii) where BMJ has agreed a CC-BY licence shall apply, and/or iii) in accordance with the terms applicable for US Federal Government officers or employees acting as part of their official duties; on a worldwide, perpetual, irrevocable, royalty-free basis to BMJ Publishing Group Ltd ("BMJ") its licensees and where the relevant Journal is co-owned by BMJ to the co-owners of the Journal, to publish the Work in this journal and any other BMJ products and to exploit all rights, as set out in our [licence](#).

The Submitting Author accepts and understands that any supply made under these terms is made by BMJ to the Submitting Author unless you are acting as an employee on behalf of your employer or a postgraduate student of an affiliated institution which is paying any applicable article publishing charge ("APC") for Open Access articles. Where the Submitting Author wishes to make the Work available on an Open Access basis (and intends to pay the relevant APC), the terms of reuse of such Open Access shall be governed by a Creative Commons licence – details of these licences and which [Creative Commons](#) licence will apply to this Work are set out in our licence referred to above.

Other than as permitted in any relevant BMJ Author's Self Archiving Policies, I confirm this Work has not been accepted for publication elsewhere, is not being considered for publication elsewhere and does not duplicate material already published. I confirm all authors consent to publication of this Work and authorise the granting of this licence.

1  
2  
3 **Title of the Study:** Pragmatic Cluster Randomised Control Trial using Vaxcards as an age-  
4 appropriate tool to incentivise and educate school students about vaccination  
5  
6  
7  
8  
9

10 **Author names:** Epstein DS<sup>1</sup>, Enticott JC<sup>4,5</sup>, Larson HJ<sup>2,3</sup>, Barton CA<sup>1</sup>.  
11  
12  
13

14 **Institutional affiliations:**  
15

16  
17 <sup>1</sup> Department of General Practice, Monash University  
18

19 <sup>2</sup> The Vaccine Confidence Project, Department of Infectious Disease Epidemiology, London  
20  
21 School of Hygiene and Tropical Medicine  
22

23 <sup>3</sup> Dept. of Health Metrics & Evaluation, University of Washington  
24  
25

26 <sup>4</sup> Monash Partners, Advanced Health Research and Translation Centre, Melbourne, Australia  
27

28 <sup>5</sup> Monash Centre for Health Research and Implementation, School of Public Health and  
29  
30 Preventive Medicine, Monash University  
31  
32

33  
34  
35 **Key Words:** Vaccine hesitancy, vaccine confidence, vaccine consent, vaccination,  
36  
37 vaccination rate, vaccine schedule, vaccine, vaccine education, preventative health, health  
38  
39 education, health promotion, vaccine education  
40  
41  
42  
43  
44

45 **Administrative Details:**  
46

47 **Trial registration:** Australian New Zealand Clinical Trials Registry (ANZCTR).  
48

49 **Registration number:**ACTRN12618001753246  
50

51 **Date of trial registration:** 25/10/2018 8:24:21 AM  
52

53 **Monash University Human Research Ethics Committee approval ID:**16814  
54

55  
56 **Manuscript word count** 2700  
57  
58  
59  
60

1  
2  
3 **Corresponding author contact details:** dan.epstein@monash.edu  
4

5 Postal: Department of General Practice, Monash University  
6

7 Building 1,  
8

9  
10 1/270 Ferntree Gully Road, Notting hill 3168  
11

12 Victoria, Australia.  
13

14 Ph: +610333024514  
15

16 Fax: +610333024300  
17  
18  
19  
20  
21

22 Ethics approval: Monash University Research and Ethics Committee Project ID 22340  
23  
24  
25  
26  
27  
28  
29  
30  
31  
32  
33  
34  
35  
36  
37  
38  
39  
40  
41  
42  
43  
44  
45  
46  
47  
48  
49  
50  
51  
52  
53  
54  
55  
56  
57  
58  
59  
60



## Abstract

**OBJECTIVES:** This trial aimed to determine if return rates of consent forms for vaccination could be improved when Vaxcards was offered as an incentive to school children.

**SETTING:** Nineteen schools in South East Melbourne participated.

**INTERVENTIONS:** Students in the experimental arm received a pack of Vaxcards when they returned their government consent form.

**OUTCOME MEASURES:** Return of 'yes' consent forms for vaccination as part of a local government council vaccine program was the primary outcome for this trial. Return rates were compared between intervention and control schools and to historical return rates.

**RESULTS:** Secondary school students (n=3087) from 19 schools participated. Compared to historical returns, a small global reduction in 'yes' responses to consent forms was observed across all schools of -4.21% in HPV consent 'yes' responses and -4.69% for DTPA. No difference between the experimental and control groups was observed.

**CONCLUSIONS:** Low consent 'yes' rates and reduction in consent rates between 2018 and 2019 for all groups are concerning. This finding highlights the need for behaviour change interventions across all groups to increase vaccine confidence. Lack of effect of incentivization with Vaxcards in this study may have been due to the timing of receiving the cards (after the decision to vaccinate had been made, not before) and the limited intensity of the intervention. Optimizing the timing and the intensity of exposure to Vaxcards could improve the outcome

1  
2  
3  
4  
5  
6  
7  
8 Strengths and Limitations of this study  
9

10 - This trial was conducted in a real world, pragmatic setting. Behavior change  
11 interventions are complex in their nature due to the ways in which behaviors  
12 develop in different contexts for different individuals.  
13  
14

15  
16 – reward of Vaxcards for returning a consent card regardless of response may mean  
17 the incentive to return a form consenting ‘yes’ was diluted, impacting the main  
18 outcome measured.  
19  
20

21  
22 -It may not have been able to effectively control for bias in this sample.  
23

24 -There may have been an unrecorded data-reporting lag by the council if they were  
25 still waiting for consent cards to come in retrospectively after following up students  
26 within schools.  
27  
28  
29  
30  
31  
32  
33  
34  
35  
36  
37  
38  
39  
40  
41  
42  
43  
44  
45  
46  
47  
48  
49  
50  
51  
52  
53  
54  
55  
56  
57  
58  
59  
60

## Background

Vaccines are a safe and efficacious preventive measure for many illnesses. Despite a long history and evidence of safety and effectiveness, vaccination rates are variable depending on geography, socioeconomic status, and confidence in vaccination<sup>1-4</sup>. Education, incentives for vaccination, and engagement with those who are hesitant to vaccinate are critical areas to investigate in order to increase vaccination rates<sup>4</sup>.

Vaccination rates vary globally but dip below targeted goals for vaccine coverage in many advanced economies including Australia, where vaccination coverage is around 90–94%<sup>5</sup>. Within Australia, there is variation in vaccine coverage between states. Meanwhile, within states there can be substantial regional variation<sup>5</sup>. Growing understanding from social network analysis shows clustering of vaccine refusal and lowering herd immunity, potentially providing focal points for outbreaks.<sup>6-8</sup>

Incentivizing vaccination is a common practice in population health programs.<sup>9-12</sup> It has been shown that monetary and non-monetary incentives improve vaccination uptake by up to three times<sup>13</sup>. A Cochrane review of strategies to improve vaccine uptake in adolescents showed health education, class-based school vaccine strategy, multi-component provider interventions and targeting parents and financial incentives may all improve uptake<sup>14</sup>.

Recent government programs within Australia implemented in 2001 such as 'no jab, no play' and 'no jab, no pay', involve withholding childcare or welfare payments from parents of unvaccinated children. The aim with these programs is to deter vaccination avoidance by withholding financial support to families eligible for these schemes<sup>15</sup>. This strict approach appears to increase catch-up vaccine status, especially in lower socioeconomic groups<sup>16</sup>, but the full implication on longer term

1  
2  
3  
4 vaccine trust and confidence is not understood. Other research has suggested it is  
5 unclear whether this punitive approach is effective <sup>15,17</sup>. Three percent of children  
6 aged 1-6 years are affected by registered or presumptive (unregistered) vaccination  
7 objection, which suggests that the overall impact of vaccination objection on  
8 vaccination rates has remained largely unchanged <sup>17</sup>.  
9  
10  
11  
12  
13  
14  
15  
16  
17

18 Large vaccination programs, such as in schools, rely on simple systems to  
19 provide informed consent to participate in the programs. Ethically, individuals must  
20 understand the risks and benefits of vaccination and organisations must gain  
21 consent before invasive procedures like intramuscular injections <sup>18</sup>. The informed  
22 consent process can be a barrier to participation in these programs and result in  
23 missed opportunities for vaccination <sup>19</sup>. Students in the state of Victoria, Australia,  
24 are provided a consent card prior to vaccination that their parents must sign and  
25 return in order to receive the HPV and DTPa vaccines around age 12, at their school.  
26 This occurs in the first year of their secondary schooling. Depending on the local  
27 region, students are provided this form from one to six months in advance,  
28 determined by their school. This means sometimes they can transition from primary  
29 to secondary school during the time period in which they are required to return the  
30 consent form. Many forms are lost, forgotten or deprioritised during this transition  
31 period and there is little incentive for the student or parent to return the form other  
32 than the benefit of receiving the vaccination <sup>19</sup>. Some vaccine programs monetarily  
33 incentivize schools or parents to attain minimum rates of consent form return;  
34 however, this school level incentivization has limited impact on target vaccination  
35 levels <sup>20</sup>.  
36  
37  
38  
39  
40  
41  
42  
43  
44  
45  
46  
47  
48  
49  
50  
51  
52  
53  
54  
55

56 The school vaccination program is a target area for interventions that can help  
57 increase vaccination rates. However, there is no consensus as to what interventions  
58 are most effective to incentivize and educate about vaccination in adolescents. The  
59  
60

1  
2  
3  
4 Cochrane review called for more understanding of adolescent specific hesitancy and  
5  
6 targeted interventions that are class-based, multimodal, use appropriate incentives  
7  
8 and involve health-education delivery <sup>14</sup>. There is other evidence game-based  
9  
10 interventions can be a successful modality for behaviour change, when they are  
11  
12 carefully designed for the right context and consider the right mechanism of action<sup>21</sup>.  
13  
14 All of these are a potentially modifiable by Vaxcards - a collectable, educational  
15  
16 table-top card game.

17  
18  
19  
20 Collectables and gamification are educational tools that can help children  
21  
22 engage with learning, generate discussion, and provide incentive to engage with the  
23  
24 content being delivered<sup>21 22</sup>. This medium of education increases motivation and  
25  
26 engagement <sup>22</sup>. The collectable card game 'Vaxcards', has cards with characters  
27  
28 based on diseases that children are vaccinated against. Vaxcards was launched after  
29  
30 a successful crowdfunding campaign in 2016, and its viability as a stand-alone game  
31  
32 with educational quality is shown by being listed as a staff pick new games award  
33  
34 on Kickstarter and by being selected in the National Serious games working group<sup>23</sup>.  
35  
36 Within the health community it has attracted significant interest, being the topic of a  
37  
38 top shared and read article on the Bill & Melinda Gates Foundation supported GAVI  
39  
40 website and the focus of a feature article in *The Lancet* <sup>24</sup>. The authors write,  
41  
42 "Vaxcards appear to be an innovative card game for children, but beneath that they  
43  
44 may have the potential to overcome some of the behavioral barriers when  
45  
46 incorporated with existing vaccination programs".

47  
48  
49  
50 The objective of the present trial is to test the use of Vaxcards as an ethical,  
51  
52 non-monetary incentive, to support school vaccination programs for secondary  
53  
54 school students. It will determine if the return of the consent form for vaccination  
55  
56 improves when the card game is offered as an incentive. We hypothesize that  
57  
58 students in schools that were incentivised to return the vaccination consent form will  
59  
60 show improved vaccination consent form return rates.

## Methods

The study will be reported using Consort guidelines and extensions for cluster and pragmatic trials<sup>25</sup>.

### a) Trial design

A pragmatic, cluster randomised controlled trial<sup>26</sup> involving secondary schools within a large local government area in the outer south east of Melbourne, Australia. Block randomisation was used to allocate participating schools to one of two groups forming experimental and control groups.

### b) Participants and setting

The participating local government area is in southeast Victoria, Australia, on the fringes of the state capital city of Melbourne. It encompasses a diverse cultural population of high and low socioeconomic status families as well as being one of the highest growth areas in the state. The vaccination consent rate within the catchment schools in 2018 varied from 64.6% to 91.3%, which is below the WHO and Australian government target of 95% coverage. At this age (12-13 years), children in this area are receiving the Australian Schedule vaccination for HPV and Diphtheria, tetanus and pertussis booster. It is also a target age for collectable card games. We were not able to collect specific individual level data on exact breakdown of age/gender/socioeconomic status of the individual students due to our ethics agreement with data collection from the council and governmental department of Education, we relied on council reported immunization rates at the school level only.

### c) Control arm.

The control arm took part in the normal processes of the school-based vaccination program. In this arm, parents of children received information about the

1  
2  
3  
4 vaccination program during term 4 of the preceding school year as usual. They were  
5  
6 asked to sign and return a consent form to the school before the vaccination program  
7  
8 occurs early in term 1 of the next school year. The local government council records  
9  
10 return rates of consent to vaccination forms.  
11  
12  
13

#### 14 Experimental arm.

15  
16 Students underwent the normal government vaccination process as above. At  
17  
18 the time of consent form distribution, children and their parent/caregiver were  
19  
20 provided a handout advising them that children who return the consent form will be  
21  
22 given a “basic pack” of the card game Vaxcards. This form contained an explanatory  
23  
24 statement about the study and offered the chance for parent or carer to decline  
25  
26 participation of their child in the study or to contact the research team for further  
27  
28 information.  
29  
30  
31

32 The school staff member responsible for coordinating the government  
33  
34 vaccination program provided one basic pack of Vaxcards to children who returned  
35  
36 a vaccination consent form in the intervention schools in February 2019. Consistent  
37  
38 with the pragmatic nature of the trial, the school determined which staff member  
39  
40 was responsible for this. The card pack was handed to each student who returned  
41  
42 his or her vaccination consent form, regardless of response or consent to vaccination.  
43  
44 This was done to not exclude non-consenting students from the intervention because  
45  
46 they could change their consent status any time prior to vaccination.  
47  
48  
49

#### 50 Proposed intervention,

51  
52 Vaxcards packs contain 13 disease character cards that represent the diseases  
53  
54 vaccinated against during the routine childhood immunisation schedule in Australia  
55  
56 (measles, mumps, rubella, diphtheria, tetanus, pertussis, HPV, rotavirus,  
57  
58 haemophilus B, hepatitis B, meningococcal, pneumococcal, varicella). Each character  
59  
60 is designed to anthropomorphise the disease, with traits of symptoms of the disease

1  
2  
3  
4 and information or 'powers' that reflect the microbiology of the disease, the vector or  
5 mode of transmission and information on global incidence and mortality that reflect  
6 how powerful the character is within the game. Each player collects their own set of  
7 disease characters and exchanges addition, subtraction and multiplier game  
8 mechanics to influence a sliding scale of 'hit points'. The game is designed so disease  
9 characters maintain their scientific names and encourage the use of terminology and  
10 symptomatology amongst players. The game play is light-hearted in nature and  
11 nonviolent or threatening.  
12  
13  
14  
15  
16  
17  
18  
19  
20  
21

#### 22 d) Outcomes

23  
24 The primary outcome was consent to vaccination based on returned council  
25 consent forms, routinely collected by local government councils.  
26  
27  
28  
29

#### 30 e) Procedure for randomisation and blinding

31  
32 A statistician, blinded to the school characteristics, conducted the  
33 randomisation and allocation sequence performed, by assigning clusters to  
34 interventions. It was not possible to blind participants to the intervention; however,  
35 they were blinded to information about the existence of a control/experimental  
36 group until after vaccination. Block randomisation determined allocation of  
37 participating schools to one of two groups forming experimental and control groups.  
38 To ensure balanced proportions of these school characteristics in each cluster in the  
39 test and control groups we stratified the randomisation by school based upon  
40 number of year 7 student enrolments ('less than 100' and 'more than 100') and  
41 consent return (<90% and ≥90%). After randomisation and allocation to groups, the  
42 lead investigator, who was not blinded, consented and recruited schools to  
43 participate. The statistician remained blinded.  
44  
45  
46  
47  
48  
49  
50  
51  
52  
53  
54  
55  
56  
57

58 Initially, two schools included in the randomisation process were not  
59 identified as specialised schools for children with intellectual disability (ID 25 and  
60



1  
2  
3  
4 12). Once identified, these two schools were removed from the original  
5  
6 randomisation allocation (as both were randomly allocated to the control group)  
7  
8 because a likely confounder was student type. Instead of excluding these two  
9  
10 schools, reallocation occurred after creation of another stratification factor (special  
11  
12 needs) of one school to the test group and other to control. For pragmatic reasons,  
13  
14 the school scheduled to begin the vaccination program later in the year than the  
15  
16 other school was assigned to the test group, as this gave the researchers more time to  
17  
18 introduce the intervention. The control school was the other school.  
19  
20  
21

#### 22 f) Sample size and pre-trial power calculation

23  
24 Within the 31 schools in the local government council, 25 were participating  
25  
26 in the 2019 local government vaccination program. Of these, in 2018, there were 12  
27  
28 schools in this council area with enrolments of less than n=100 year 7 students aged  
29  
30 12-13 and n=11 schools with 100 or more. There were eight schools with a historical  
31  
32 consent return rate of less than 90%.  
33

34 Of the 31 eligible schools, six schools were not participating in the council  
35  
36 vaccination program and were excluded (Figure 1). One school had already returned  
37  
38 the council consent forms and was excluded. This school (from the experimental  
39  
40 group) was replaced by another school from the same strata, randomly selected from  
41  
42 the control group. Of the remaining 24 schools, 19 agreed to participate in the trial  
43  
44 and seven were randomised to the experimental arm (n=965 students) and 12 to the  
45  
46 control arm (n=2122 students).  
47  
48

49 A pre-study power calculation was conducted assuming 23 clusters of school  
50  
51 involvement. The study had ample power (>95%) to detect a change in proportion of  
52  
53 5%. The power calculation was done using Stata statistical software for a stepped-  
54  
55 wedge trial with 23 clusters defined at the level of the school. The primary outcome  
56  
57 measure was the return of the consent form from 120 students per school,  
58  
59 significance level set at 0.05, intraclass correlation coefficient (ICC) within schools of  
60

1  
2  
3 0.3, approximately half the schools receiving the intervention (ie steps=1) , and data  
4  
5 examined at two time points (baseline (returns in 2018), year 1 (returns in 2019)).  
6  
7  
8  
9

10 g) Data collection methods, instruments used:  
11  
12

13 The primary outcome data was de-identified, routinely reported local  
14 government council data on consent form returns which was provided to the  
15 researchers by the local government council. Return of consent cards and number  
16  
17 consenting to vaccination was reported to the researchers for analysis.  
18  
19  
20  
21  
22

23 h) Patient and Public Involvement  
24

25 No patients were involved in the study. Stakeholders of teachers and council  
26 vaccination services were involved in the design of the trial to best fit in the existing  
27 vaccine schedule without disrupting workflow of the current consent card collection  
28 and vaccination process.  
29  
30  
31  
32  
33

34  
35 Data analysis  
36

37 The main outcomes were the consent rate change (HPV, DaPa, both) for each school,  
38 which was calculated by the comparison between the council collected vaccine  
39 consent rates from the baseline in 2018 compared to the trial year of 2019.  
40  
41  
42

43 We used linear regression to investigate each of these three outcomes with three  
44 bivariate independent variables of 2018 school students in year 7 (>100; <100),  
45 previous 2018 consent form return rates (<90%; >90%), and intervention group  
46 allocation (test; control).  
47  
48  
49  
50  
51

52  
53 We used Stata 16 (Stata Corp, College Station, TX) for the regression analyses.  
54  
55  
56  
57

58 h) Participant flow  
59  
60

1  
2  
3  
4  
5  
6  
7  
8  
9  
10  
11  
12  
13  
14  
15  
16  
17  
18  
19  
20  
21  
22  
23  
24  
25  
26  
27  
28  
29  
30  
31  
32  
33  
34  
35  
36  
37  
38  
39  
40  
41  
42  
43  
44  
45  
46  
47  
48  
49  
50  
51  
52  
53  
54  
55  
56  
57  
58  
59  
60

Several schools declined the invitation to be involved in the trial. The most common reasons included they did not participate in the council vaccine program (six) were too busy or had other commitments (two), the research topic was 'too sensitive' (three) and one school requested the investigators seek an additional approval from a Catholic schools research ethics committee which was unable to be attained within the timeframe of the study (one).

Figure 1 PRISMA chart showing the flow of participant's through the RCT

## Results

The trial involved a total of 3087 secondary school students in 19 school clusters. Consent forms were returned from n=2754 students. Of those returned n=2081 were marked 'yes' comprising 75.6% of all returned HPV forms (range between schools= 50.3% - 90.6%) and n=2113 (76.7%) of all returned DaPa forms (range between schools= 54.6% – 92.2%) in 2019. There were 327 outstanding consent cards that were not returned according to council data.

In regards to primary outcome, there was so significant difference between control and experimental groups in vaccine consent rates.

Subgroup analysis demonstrated a significant improvement in consent to vaccination between 2018-2019 for students from small schools (<100 students in the year level). The combined increase in returned 'yes' forms for both vaccines in these schools was 4.49% (10.99% better than larger schools, with a coefficient -0.11 for

school size on vaccination rate change,  $p = 0.04$  CI(-0.22 - -0.01)). There was no significant difference on sub-group analysis of prior vaccination rates in schools. (see table 1)

Compared to the historical comparison, there was a mean global reduction in 'yes' responses in returned consent forms across all schools of -4.21% for HPV and -4.69% for DaPa. The average 'yes' response (ie. a positive response consenting to participation in vaccination) across all schools for the previous year (2018) was 79.77% for HPV (range of 56.6% - 90.72%) and 81.42% for DaPa (range of 61.54% - 95.88%). There was no statistically significant difference between the change in proportion of returned consent forms between experimental and control groups with a consent to vaccination. (see table 2)

There was considerable intra-school variation in the proportion responding 'yes' between 2018 and 2019. 'Yes' consent for HPV forms ranged from -21.5% to +34.02%, and yes consent for DaPa ranged from -17.27% to +29.92%.

**Table 1: Analysis vaccination consent rate changes between Intervention and sub-strata.**

| HPV <sup>^</sup>      |                    |                     |        |      |                      |
|-----------------------|--------------------|---------------------|--------|------|----------------------|
|                       | % change           | Difference          | Coef.  | p.   | 95% CI               |
|                       | control            | intervention        |        |      |                      |
| <b>Intervention</b>   | -2.05%             | -2.74%              | 0.69%  | 0.37 | -0.05 (-0.16 - 0.07) |
|                       | <100 students      | 100+ students       |        |      |                      |
| <b>Size of school</b> | 3.98%              | -6.33%              | 10.31% | 0.06 | -0.11 (-0.22 - 0.01) |
|                       | Low consent school | High consent school |        |      |                      |

|                              |                    |                     |              |           |                       |
|------------------------------|--------------------|---------------------|--------------|-----------|-----------------------|
| Previous consent rate        | 0.44%              | -6.65%              | 7.10%        | 0.28      | -0.06 (-0.17 - 0.05)  |
| <b>DtPa*</b>                 |                    |                     |              |           |                       |
|                              | <b>% change</b>    | <b>Difference</b>   | <b>Coef.</b> | <b>p.</b> | <b>95% CI</b>         |
|                              | <b>control</b>     | <b>intervention</b> |              |           |                       |
| Intervention group           | -2.35%             | -1.79%              | -0.57%       | 0.43      | -0.04 (-0.15 - 0.07)  |
|                              | <100 students      | 100+ students       |              |           |                       |
| Size of school               | 5.00%              | -6.67%              | 11.68%       | 0.03      | -0.12 (-0.23 - -0.01) |
|                              | Low consent school | High consent school |              |           |                       |
| previous consent rate        | 0.89%              | -6.89%              | 7.78%        | 0.2       | -0.06 (-0.17 - 0.04)  |
| <b>Combined DtPa* + HPV^</b> |                    |                     |              |           |                       |
|                              | <b>% change</b>    | <b>Difference</b>   | <b>Coef.</b> | <b>p.</b> | <b>95% CI</b>         |
|                              | <b>control</b>     | <b>intervention</b> |              |           |                       |
| Intervention group           | -2.20%             | -2.26%              | 0.06%        | 0.39      | -0.05 (-0.15 - 0.06)  |
|                              | <100 students      | 100+ students       |              |           |                       |
| Size of school               | 4.49%              | -6.50%              | 10.99%       | 0.04      | -0.11 (-0.22 - -0.01) |
|                              | Low consent school | High consent school |              |           |                       |
| previous consent rate        | 0.67%              | -6.77%              | 7.44%        | 0.22      | -0.1 (-0.17 - 0.04)   |

^HPV = Human Papilloma Virus vaccine

\*DtPa = Diphtheria, Tetanus and Pertussis vaccine

Table 2: Combined intervention and control school consent rate changes

| HPV                       | 2018 average consent | 2019 average consent | Difference     |
|---------------------------|----------------------|----------------------|----------------|
| consent all schools       | 79.7%                | 75.6%                | -4.2%          |
| range                     | 56.6 - 90.7%         | 50.3 - 90.6%         | -21.5 - 34.0%  |
| <b>DtPa</b>               |                      |                      |                |
| consent all schools       | 81.4%                | 76.7%                | -4.7%          |
| range                     | 61.5 - 95.9%         | 54.5 - 92.2%         | -17.3 - 29.9 % |
| <b>Combined HPV +DtPa</b> |                      |                      |                |
| consent all schools       | 80.6%                | 75.9%                | -4.75%         |
| Range                     | 59.4 - 93.3%         | 52.4 - 91.4%         | -19.4 - 32.0%  |

## Discussion

There was no significant difference in the consent rates between experimental and control groups and this likely reflects the complexity of vaccine confidence interventions and the challenges of behavior change that requires multimodal interventions. One major finding from this data is the low consent rates and the global reduction in consent rates between 2018 and 2019 for both the control and experimental groups. Consent for vaccination is far below target range specified by the local government council area in which this trial was undertaken of 95%. This highlights the need for interventions to increase these rates and prevent further vaccine hesitancy in the setting of public-school vaccination programs.

In order to improve vaccination rates towards target levels of >95%, we must improve the low consent rates of these students. Consent is required by these school

1  
2  
3  
4 vaccination programs in order to vaccinate the children, so without targeting the  
5  
6 barriers to consenting, we will not improve actual rates of vaccinated individuals in  
7  
8 the student population.  
9

10  
11  
12 Vaxcards can be considered a desirable and 'ethical', non-monetary incentive to  
13  
14 influence behavior change that is directed toward the adolescents being vaccinated.  
15  
16 Collectables and gamification are important educational tools that can help  
17  
18 children engage with learning, generate discussion, and provide an incentive  
19  
20 to engage with the content being delivered<sup>22</sup>. The theoretical underpinnings of  
21  
22 Vaxcards as an intervention is multifaceted. This is represented in our logic model of  
23  
24 the theory of change (Figure 2). Initially, the use of receiving Vaxcards as an  
25  
26 incentive to return consent forms acts, from a behavioral standpoint, as a reward. As  
27  
28 we previously mentioned, rewards have shown good effect in increasing vaccine  
29  
30 uptake, but there have been no tangible take-home interventions directly designed  
31  
32 for this age group. Secondly, Vaxcards acts as a social tool for students, parents,  
33  
34 peers and teachers to interact and lower the barrier to discussing topics around  
35  
36 vaccination and diseases. Thirdly, it utilizes these educational points throughout the  
37  
38 gameplay to increase knowledge of the infectious diseases in the content of the  
39  
40 game, increasing salience of their risks and the benefit of preventative vaccination  
41  
42 against them. This requires the buy in of government or organisations to distribute  
43  
44 Vaxcards alongside vaccination programs, and school stakeholders to also deliver  
45  
46 and engage with the tool. The timely delivery and playing of the game should  
47  
48 theoretically result in increased vaccine consent and uptake, conversations around  
49  
50 vaccines, knowledge of the diseases and increase vaccine confidence. The  
51  
52 intervention drew on principles of use of incentive, and took a pragmatic approach  
53  
54 adding to existing council and school strategies to improve consent return rates, but  
55  
56 was unable to impact return rates in this trial.  
57  
58  
59

60 Figure 2: Logic Model (or theory of change) for Vaxcards.

1  
2  
3  
4  
5  
6  
7  
8  
9  
10 The first limitation to improving consent is reducing the logistical barriers to  
11 returning the consent card. The card is provided in some schools the year before the  
12 vaccination occurs. This means that some students receive the cards in their last year  
13 of primary school, to bring home and have their parent's sign, only to attempt  
14 returning the card to the child's school when the new school year begins. Many  
15 students change schools during these two years and there is a risk of lost to follow-  
16 up when changing school systems.  
17  
18  
19  
20  
21  
22  
23

24  
25  
26 Smaller schools did show a significant improvement in consent for vaccination,  
27 irrespective of previous vaccination consent levels. One explanation may be that  
28 smaller schools are better placed to communicate health promotion activities to  
29 students and parents given the individual concerns vaccination can generate. It  
30 could explain why larger schools are having trouble improving vaccine consent  
31 given the large difference between the one-year time difference and the concurrent  
32 emergence of hesitancy in the community.  
33  
34  
35  
36  
37  
38  
39  
40  
41

42 There is also an element of timing in the provision of the incentive and the intensity  
43 of the intervention. Perhaps exposure to the intervention earlier will lead to more of  
44 an impact. For example, receiving the Vaxcards with the educational packet from the  
45 council instead of as a reward for returning consent forms will enable a chance of  
46 impacting vaccine hesitancy to those who are most likely to require it, who never  
47 returned consent cards and were therefore not exposed to the intervention. It is also  
48 likely that the intensity was not enough. In this study we do not know how the  
49 participants used the cards, whether they engaged with the information in the cards,  
50 or had an opportunity to clarify their understanding to learn more about them.  
51  
52  
53  
54  
55  
56  
57  
58  
59  
60 Introduction or integration of the game in science or health classes could reinforce



1  
2  
3  
4 the educational aspects and impact on vaccine uptake, as evidenced in the Cochrane  
5 review of adolescent vaccine interventions <sup>14</sup>.  
6  
7  
8  
9

10 In a pragmatic sense it is unlikely a single intervention alone will largely change  
11 complex paradigm like vaccine hesitancy. In future trials, we would like to  
12 investigate the intervention in combination with other incentives and educational  
13 material to determine if a multifaceted approach can shift consent rates.  
14  
15  
16  
17  
18  
19

### 20 Strengths and Limitations

21 The outcomes of this trial were impacted by the unexpectedly large deviation in  
22 vaccination consent between the clusters of schools. The sample size was based in  
23 part on an estimated effect size, which may have been too optimistic. A larger study  
24 considering all these things is needed to more definitively determine efficacy of  
25 Vaxcards as a standalone intervention when delivered as an ethical incentive for  
26 vaccination. We also do not know the vaccine outcome of children who did not  
27 return a consent form, declined school vaccine or ticked 'had elsewhere'. It is  
28 possible these students did indeed get vaccinated outside the school program and  
29 the 'consent' rates do not infer true vaccine status of the group. Lastly, all students  
30 who returned consent cards were given a pack of Vaxcards, regardless of response.  
31 This decision was made pragmatically by the schools to not discriminate based on  
32 responses and to include all students. It also aligned with incentives of the school,  
33 which are measured in total consent card return rate, not consent 'yes' return rates.  
34 This is an interesting point to possibly consider as a target to increase consent 'yes'  
35 rates, to change school performance indicators to align with public health outcomes  
36 rather than the return of forms regardless of outcome. Nevertheless, reward of  
37 Vaxcards for returning a consent card regardless of response may mean the  
38 incentive to return a form consenting 'yes' was diluted, impacting the main outcome  
39 measured.  
40  
41  
42  
43  
44  
45  
46  
47  
48  
49  
50  
51  
52  
53  
54  
55  
56  
57  
58  
59  
60

1  
2  
3  
4 A further limitation of this study includes the insufficient cluster sizes  
5 required for statistical assessment. Also, it may not have been able to effectively  
6 control for bias in this study and so there are lessons for future studies of Vaxcards  
7 and of vaccine hesitancy in schools for a larger trial. There may have been an  
8 unrecorded data-reporting lag by the council if they were still waiting for consent  
9 cards to come in retrospectively after following up students within schools.  
10  
11  
12  
13  
14  
15  
16  
17

18 This trial was also conducted in a real world, pragmatic setting. Behavior  
19 change interventions are complex in their nature due to the ways in which behaviors  
20 develop in different contexts for different individuals.<sup>27 28</sup> The design of this trial  
21 may also have diluted the effect if the intervention efficacy that may impact the  
22 results. For this reason, a much larger trial involving more clusters to account for  
23 this dilution effect would be suitable to further assess the intervention.  
24  
25  
26  
27  
28  
29  
30  
31

### 32 Conclusions

33 Vaxcards is a novel intervention that addresses many recommendations made  
34 in the recent Cochrane review of effective interventions to improve vaccine uptake  
35 in adolescents<sup>14</sup>. These elements include being an ethical incentive that can be  
36 incorporated into other health education and health promotion initiatives as part of  
37 multi-component approaches to support vaccine uptake amongst school-aged  
38 children. This potential requires further investigation to assess impact on vaccine  
39 uptake and vaccine confidence. A combination of optimizing the timing and the  
40 intensity of the intervention as part of a multimodal approach will be required to  
41 significantly shift hesitancy and improve consent rates and ultimately uptake of  
42 vaccination.  
43  
44  
45  
46  
47  
48  
49  
50  
51  
52  
53  
54  
55

### 56 Conflicts of interest

57 The lead author is the creator of Vaxcards that supplied the card games for  
58 evaluation in this study and this was disclosed to the participating schools and  
59  
60

1  
2  
3  
4 councils involved in the vaccination project. This interest will be disclosed in all  
5  
6 subsequent research output.  
7  
8  
9  
10  
11  
12  
13  
14  
15  
16  
17  
18  
19  
20  
21  
22  
23  
24  
25  
26  
27  
28  
29  
30  
31  
32  
33  
34  
35  
36  
37  
38  
39  
40  
41  
42  
43  
44  
45  
46  
47  
48  
49  
50  
51  
52  
53  
54  
55  
56  
57  
58  
59  
60

For peer review only

1  
2  
3  
4  
5 Contribution statement:  
6

7 DE, JE, HL and CB contributed to the conception or design of the study, data collection  
8 analysis, interpretation of data drafting the work or revising it critically, final approval of the  
9 version to be published and agreement to be accountable for all aspects of the work. JE  
10 contributed to the conception or design of the study, data collection analysis, interpretation of  
11 data drafting the work or revising it critically, final approval of the version to be published  
12 and agreement to be accountable for all aspects of the work  
13  
14  
15  
16  
17  
18  
19  
20  
21  
22

23 Data sharing: Data from the trial is accessible with email correspondence to the authors.  
24  
25  
26  
27

28 Competing interests: The lead author is the creator of Vaxcards that supplied the card games  
29 for evaluation in this study and this was disclosed to the participating schools and councils  
30 involved in the vaccination project. This interest will be disclosed in all subsequent research  
31 output.  
32  
33  
34  
35  
36  
37  
38  
39

40 Funding: No funding sought or used for this research  
41  
42  
43  
44  
45  
46  
47  
48  
49  
50  
51  
52  
53  
54  
55  
56  
57  
58  
59  
60

## REFERENCES

1. Black S, Rappuoli R. A crisis of public confidence in vaccines: American Association for the Advancement of Science, 2010.
2. Leask J. Target the fence-sitters. *Nature* 2011;473(7348):443-45.
3. Larson HJ, Jarrett C, Eckersberger E, et al. Understanding vaccine hesitancy around vaccines and vaccination from a global perspective: a systematic review of published literature, 2007–2012. *Vaccine* 2014;32(19):2150-59.
4. Browne M. Epistemic divides and ontological confusions: The psychology of vaccine scepticism. *Human vaccines & immunotherapeutics* 2018;14(10):2540-42.
5. Health Legislation Amendment Act 1983, 1983.
6. Liu F, Enanoria WT, Zipprich J, et al. The role of vaccination coverage, individual behaviors, and the public health response in the control of measles epidemics: an agent-based simulation for California. *BMC public health* 2015;15(1):447.
7. Salathé M, Bonhoeffer S. The effect of opinion clustering on disease outbreaks. *Journal of The Royal Society Interface* 2008;5(29):1505-08.
8. Onnela J-P, Landon BE, Kahn A-L, et al. Polio vaccine hesitancy in the networks and neighborhoods of Malegaon, India. *Social science & medicine* 2016;153:99-106.
9. Topp L, Day CA, Wand H, et al. A randomised controlled trial of financial incentives to increase hepatitis B vaccination completion among people who inject drugs in Australia. *Preventive Medicine* 2013;57(4):297-303.
10. Seal KH, Kral AH, Lorvick J, et al. A randomized controlled trial of monetary incentives vs. outreach to enhance adherence to the hepatitis B vaccine series among injection drug users. *Drug and Alcohol Dependence* 2003;71(2):127-31.
11. Unti LM, Coyle KK, Woodruff BA, et al. Incentives and motivators in school-based hepatitis B vaccination programs. *Journal of School Health* 1997;67(7):265-68.
12. Dale LP, White L, Mitchell M, et al. Smartphone app uses loyalty point incentives and push notifications to encourage influenza vaccine uptake. *Vaccine* 2019;37(32):4594-600.
13. Achat H, McIntyre P, Burgess M. Health care incentives in immunisation. *Australian and New Zealand journal of public health* 1999;23(3):285-88.
14. Abdullahi LH, Kagina BM, Ndze VN, et al. Improving vaccination uptake among adolescents. *Cochrane Database of Systematic Reviews* 2020(1)
15. Beard FH, Hull BP, Leask J, et al. Trends and patterns in vaccination objection, Australia, 2002–2013. *Medical Journal of Australia* 2016;204(7):275-75.
16. Hull BP, Beard FH, Hendry AJ, et al. “No jab, no pay”: catch-up vaccination activity during its first two years. *Medical Journal of Australia* 2020
17. Beard FH, Leask J, McIntyre PB. No Jab, No Pay and vaccine refusal in Australia: the jury is out. *Medical Journal of Australia* 2017;206(9):381-83.
18. Soekhai V, de Bekker-Grob EW, Ellis AR, et al. Discrete Choice Experiments in Health Economics: Past, Present and Future. *Pharmacoeconomics* 2019;37(2):201-26. doi: 10.1007/s40273-018-0734-2 [published Online First: 2018/11/06]
19. Ward K, Quinn H, Bachelor M, et al. Adolescent school-based vaccination in Australia. *Communicable diseases intelligence quarterly report* 2013;37(2):E156-67.
20. Wigham S, Ternent L, Bryant A, et al. Parental financial incentives for increasing preschool vaccination uptake: systematic review. *Pediatrics* 2014;134(4):e1117-e28.
21. Epstein DS, Zemski A, Enticott J, et al. Tabletop Board Game Elements and Gamification Interventions for Health Behavior Change: Realist Review and Proposal of a Game Design Framework. *JMIR serious games* 2021;9(1):e23302.
22. Gamification in education; 2014. Proceedings of 9th International Balkan Education and Science Conference.
23. SGANZ. Serious Games Australia and New Zealand.

- 1  
2  
3 24. Tang PK. Vaccination and immunisation: can they be taught to children? *The Lancet Child &*  
4 *Adolescent Health* 2017;1(1):14.  
5 25. Campbell MK, Piaggio G, Elbourne DR, et al. Consort 2010 statement: extension to cluster  
6 randomised trials. *Bmj* 2012;345:e5661.  
7 26. Roland M, Torgerson DJ. Understanding controlled trials: What are pragmatic trials? *Bmj*  
8 1998;316(7127):285.  
9 27. Greenhalgh T, Plsek P, Wilson T, et al. Response to 'The appropriation of complexity theory in  
10 health care'. *Journal of Health Services Research & Policy* 2010;15(2):115-17.  
11 28. Shiell A, Hawe P, Gold L. Complex interventions or complex systems? Implications for health  
12 economic evaluation. *Bmj* 2008;336(7656):1281-83.  
13  
14

15  
16 Figure legend:

17  
18 Figure 1 PRISMA chart showing the flow of participant's through the RCT

19  
20 Figure 2 Logic Model (or theory of change) for Vaxcards.  
21  
22  
23  
24  
25  
26  
27  
28  
29  
30  
31  
32  
33  
34  
35  
36  
37  
38  
39  
40  
41  
42  
43  
44  
45  
46  
47  
48  
49  
50  
51  
52  
53  
54  
55  
56  
57  
58  
59  
60



Figure 1 PRISMA chart showing the flow of participant's through the RCT

159x119mm (146 x 146 DPI)

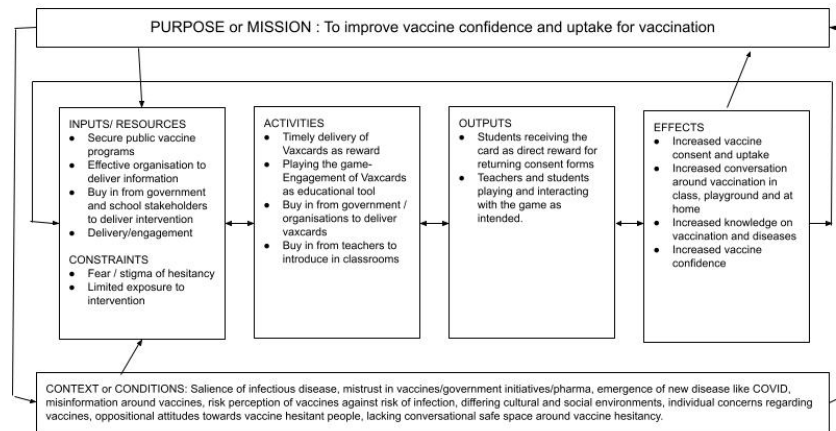

Figure 2 logic model

338x254mm (72 x 72 DPI)



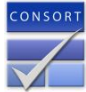

## CONSORT 2010 checklist of information to include when reporting a randomised trial\*

| Section/Topic                    | Item No | Checklist item                                                                                                                                                                              | Reported on page No |
|----------------------------------|---------|---------------------------------------------------------------------------------------------------------------------------------------------------------------------------------------------|---------------------|
| <b>Title and abstract</b>        |         |                                                                                                                                                                                             |                     |
|                                  | 1a      | Identification as a randomised trial in the title                                                                                                                                           | 1                   |
|                                  | 1b      | Structured summary of trial design, methods, results, and conclusions (for specific guidance see CONSORT for abstracts)                                                                     | 2                   |
| <b>Introduction</b>              |         |                                                                                                                                                                                             |                     |
| Background and objectives        | 2a      | Scientific background and explanation of rationale                                                                                                                                          | 4                   |
|                                  | 2b      | Specific objectives or hypotheses                                                                                                                                                           | 6                   |
| <b>Methods</b>                   |         |                                                                                                                                                                                             |                     |
| Trial design                     | 3a      | Description of trial design (such as parallel, factorial) including allocation ratio                                                                                                        | 7                   |
|                                  | 3b      | Important changes to methods after trial commencement (such as eligibility criteria), with reasons                                                                                          | 7                   |
| Participants                     | 4a      | Eligibility criteria for participants                                                                                                                                                       | 7                   |
|                                  | 4b      | Settings and locations where the data were collected                                                                                                                                        | 7                   |
| Interventions                    | 5       | The interventions for each group with sufficient details to allow replication, including how and when they were actually administered                                                       | 8                   |
| Outcomes                         | 6a      | Completely defined pre-specified primary and secondary outcome measures, including how and when they were assessed                                                                          | 9                   |
|                                  | 6b      | Any changes to trial outcomes after the trial commenced, with reasons                                                                                                                       | 10                  |
| Sample size                      | 7a      | How sample size was determined                                                                                                                                                              | 10                  |
|                                  | 7b      | When applicable, explanation of any interim analyses and stopping guidelines                                                                                                                | na                  |
| <b>Randomisation:</b>            |         |                                                                                                                                                                                             |                     |
| Sequence generation              | 8a      | Method used to generate the random allocation sequence                                                                                                                                      | 9                   |
|                                  | 8b      | Type of randomisation; details of any restriction (such as blocking and block size)                                                                                                         | 9                   |
| Allocation concealment mechanism | 9       | Mechanism used to implement the random allocation sequence (such as sequentially numbered containers), describing any steps taken to conceal the sequence until interventions were assigned | 9                   |
| Implementation                   | 10      | Who generated the random allocation sequence, who enrolled participants, and who assigned participants to interventions                                                                     | 9                   |
| Blinding                         | 11a     | If done, who was blinded after assignment to interventions (for example, participants, care providers, those                                                                                | 9                   |

|    |                          |                                                             |                                                                                                                  |    |
|----|--------------------------|-------------------------------------------------------------|------------------------------------------------------------------------------------------------------------------|----|
| 1  |                          | assessing outcomes) and how                                 |                                                                                                                  |    |
| 2  | 11b                      | If relevant, description of the similarity of interventions | 8                                                                                                                |    |
| 3  | Statistical methods      | 12a                                                         | Statistical methods used to compare groups for primary and secondary outcomes                                    | 11 |
| 4  |                          | 12b                                                         | Methods for additional analyses, such as subgroup analyses and adjusted analyses                                 | 11 |
| 5  |                          |                                                             |                                                                                                                  |    |
| 6  | <b>Results</b>           |                                                             |                                                                                                                  |    |
| 7  | Participant flow (a      | 13a                                                         | For each group, the numbers of participants who were randomly assigned, received intended treatment, and         | 12 |
| 8  | diagram is strongly      |                                                             | were analysed for the primary outcome                                                                            |    |
| 9  | recommended)             | 13b                                                         | For each group, losses and exclusions after randomisation, together with reasons                                 | 13 |
| 10 | Recruitment              | 14a                                                         | Dates defining the periods of recruitment and follow-up                                                          | 12 |
| 11 |                          | 14b                                                         | Why the trial ended or was stopped                                                                               | 12 |
| 12 | Baseline data            | 15                                                          | A table showing baseline demographic and clinical characteristics for each group                                 | 13 |
| 13 | Numbers analysed         | 16                                                          | For each group, number of participants (denominator) included in each analysis and whether the analysis was      | 13 |
| 14 |                          |                                                             | by original assigned groups                                                                                      |    |
| 15 | Outcomes and             | 17a                                                         | For each primary and secondary outcome, results for each group, and the estimated effect size and its            | 13 |
| 16 | estimation               |                                                             | precision (such as 95% confidence interval)                                                                      |    |
| 17 |                          | 17b                                                         | For binary outcomes, presentation of both absolute and relative effect sizes is recommended                      | 13 |
| 18 | Ancillary analyses       | 18                                                          | Results of any other analyses performed, including subgroup analyses and adjusted analyses, distinguishing       | 13 |
| 19 |                          |                                                             | pre-specified from exploratory                                                                                   |    |
| 20 | Harms                    | 19                                                          | All important harms or unintended effects in each group (for specific guidance see CONSORT for harms)            | 12 |
| 21 |                          |                                                             |                                                                                                                  |    |
| 22 | <b>Discussion</b>        |                                                             |                                                                                                                  |    |
| 23 | Limitations              | 20                                                          | Trial limitations, addressing sources of potential bias, imprecision, and, if relevant, multiplicity of analyses | 18 |
| 24 | Generalisability         | 21                                                          | Generalisability (external validity, applicability) of the trial findings                                        | 18 |
| 25 | Interpretation           | 22                                                          | Interpretation consistent with results, balancing benefits and harms, and considering other relevant evidence    | 19 |
| 26 |                          |                                                             |                                                                                                                  |    |
| 27 | <b>Other information</b> |                                                             |                                                                                                                  |    |
| 28 | Registration             | 23                                                          | Registration number and name of trial registry                                                                   | 1  |
| 29 | Protocol                 | 24                                                          | Where the full trial protocol can be accessed, if available                                                      | 1  |
| 30 | Funding                  | 25                                                          | Sources of funding and other support (such as supply of drugs), role of funders                                  | 1  |

\*We strongly recommend reading this statement in conjunction with the CONSORT 2010 Explanation and Elaboration for important clarifications on all the items. If relevant, we also recommend reading CONSORT extensions for cluster randomised trials, non-inferiority and equivalence trials, non-pharmacological treatments, herbal interventions, and pragmatic trials. Additional extensions are forthcoming: for those and for up to date references relevant to this checklist, see [www.consort-statement.org](http://www.consort-statement.org).
